# Supplementary material for: Regulation of volatile and non-volatile pheromone attractants depends upon male social status
Source: PubMed Central journal article supplement (PMC6346026; doi:10.1038/s41598-018-36887-y), 2019-01-24
Supplement: 41598_2018_36887_MOESM1_ESM.pdf [file 41598_2018_36887_MOESM1_ESM.pdf]

# Regulation of volatile and non-volatile pheromone attractants depends upon male social status

M. Thoß<sup>1¶</sup>, K.C. Luzynski<sup>1¶</sup>, V.M. Enk<sup>2</sup>, E. Razzazi-Fazeli<sup>2</sup>, J. Kwak<sup>3#a</sup>, I. Ortner<sup>4#b</sup>, and D. J. Penn<sup>1\*</sup>

<sup>1</sup> Department of Integrative Biology and Evolution, Konrad Lorenz Institute of Ethology, University of Veterinary Medicine, Vienna, Austria

<sup>2</sup> Proteomics Unit, VetCORE Facility for Research, University of Veterinary Medicine, Vienna, Austria

<sup>3</sup> Department of Integrative Biology and Evolution, Research Institute of Wildlife Ecology, University of Veterinary Medicine Vienna, Vienna, Austria

<sup>4</sup> Institute of Statistics and Mathematical Methods in Economics, TU Wien, Vienna, Austria

<sup>#a</sup>Current Address: International Flavors & Fragrances Inc., Union Beach, New Jersey, USA

<sup>#b</sup>Current Address: Department of Mathematics, Statistics Section, KU Leuven, Belgium

\* Corresponding author

[dustin.penn@vetmeduni.ac.at](mailto:dustin.penn@vetmeduni.ac.at)

<sup>¶</sup>These authors contributed equally to this work.

**Regulation of volatile and non-volatile pheromone attractants depends upon male social status**

**Supplementary Tables S1 to S11**

Table S1. Study mice information at the time of first urine collection as well as social status.

| pop | sex | ID     | Age at initial urine collection (days) | Mass at initial urine collection (grams) | PC ratio of initial urine collection | PC rank of initial urine collection | Dominance Index | Social status based on Dominance Index | Aggressive Interactions | Investigatory Interactions | Submissive Interactions |
|-----|-----|--------|----------------------------------------|------------------------------------------|--------------------------------------|-------------------------------------|-----------------|----------------------------------------|-------------------------|----------------------------|-------------------------|
| A   | m   | K17.4  | 198                                    | 27.4                                     | 13.36                                | High                                | 0.85            | DOM                                    | 127                     | 17                         | 26                      |
| A   | m   | K21.5  | 159                                    | 27.6                                     | 2.60                                 | Low                                 | 0.23            | SUB                                    | 14                      | 17                         | 106                     |
| A   | m   | K24.6  | 193                                    | 27.4                                     | 4.17                                 | Intermediate                        | 0.94            | DOM                                    | 140                     | 26                         | 11                      |
| A   | m   | K29.5  | 193                                    | 27.1                                     | 5.61                                 | Intermediate                        | 0.21            | SUB                                    | 6                       | 9                          | 56                      |
| A   | f   | K17.1  | 198                                    | 18.9                                     | 3.29                                 |                                     | 0.74            | SUB                                    | 4                       | 13                         | 6                       |
| A   | f   | K21.1  | 159                                    | 24.6                                     | 0.91                                 |                                     | 0.56            | SUB                                    | 10                      | 8                          | 14                      |
| A   | f   | K24.2  | 193                                    | 17.7                                     | 2.34                                 |                                     | 0.08            | SUB                                    | 1                       | 8                          | 101                     |
| A   | f   | K29.1  | 193                                    | 26.6                                     | 3.54                                 |                                     | 0.92            | DOM                                    | 95                      | 25                         | 10                      |
| B   | m   | K19.5  | 196                                    | 25.8                                     | 12.38                                | Intermediate                        | 0.32            | SUB                                    | 15                      | 3                          | 39                      |
| B   | m   | K28.4  | 195                                    | 25.1                                     | 8.42                                 | Intermediate                        | 0.27            | SUB                                    | 11                      | 7                          | 49                      |
| B   | m   | K29.7  | 193                                    | 25.6                                     | 4.32                                 | Low                                 | 0.91            | DOM                                    | 140                     | 17                         | 16                      |
| B   | m   | K30.9  | 193                                    | 25.8                                     | 23.22                                | High                                | 0.80            | DOM                                    | 70                      | 15                         | 21                      |
| B   | f   | K19.1  | 196                                    | 22                                       | 3.31                                 |                                     | 0.23            | SUB                                    | 4                       | 11                         | 50                      |
| B   | f   | K28.2  | 195                                    | 21.2                                     | 7.60                                 |                                     | 0.31            | SUB                                    | 3                       | 2                          | 11                      |
| B   | f   | K29.2  | 193                                    | 26.4                                     | 1.86                                 |                                     | 0.94            | DOM                                    | 14                      | 16                         | 2                       |
| B   | f   | K30.1  | 193                                    | 19.4                                     | 2.32                                 |                                     | 0.48            | SUB                                    | 6                       | 9                          | 16                      |
| C   | m   | K16.5  | 192                                    | 23.5                                     | 7.27                                 | Intermediate                        | 0.39            | SUB                                    | 5                       | 10                         | 23                      |
| C   | m   | K22.5  | 199                                    | 23.8                                     | 5.54                                 | Low                                 | 0.96            | DOM                                    | 163                     | 98                         | 12                      |
| C   | m   | K4.8   | 184                                    | 23.5                                     | 25.10                                | High                                | 0.94            | DOM                                    | 176                     | 107                        | 17                      |
| C   | m   | K9.2   | 202                                    | 23.8                                     | 11.73                                | Intermediate                        | 0.29            | SUB                                    | 3                       | 10                         | 32                      |
| C   | f   | K16.2  | 192                                    | 20.6                                     | 1.89                                 |                                     | 0.90            | DOM                                    | 136                     | 75                         | 23                      |
| C   | f   | K22.2  | 199                                    | 22.7                                     | 1.53                                 |                                     | 0.90            | DOM                                    | 93                      | 61                         | 18                      |
| C   | f   | K4.3   | 184                                    | 20.4                                     | 2.44                                 |                                     | 0.23            | SUB                                    | 5                       | 42                         | 154                     |
| C   | f   | K9.1   | 202                                    | 23.5                                     | 3.76                                 |                                     | 0.36            | SUB                                    | 16                      | 49                         | 117                     |
| D   | m   | K12.8  | 145                                    | 23.1                                     | 6.51                                 | Intermediate                        | 0.67            | SUB                                    | 0                       | 6                          | 3                       |
| D   | m   | K2.5   | 200                                    | 23.4                                     | 3.34                                 | Low                                 | 0.00            | SUB                                    | 0                       | 0                          | 0                       |
| D   | m   | K24.5  | 193                                    | 23.2                                     | 11.70                                | High                                | 0.38            | SUB                                    | 4                       | 5                          | 15                      |
| D   | m   | K26.6  | 152                                    | 23.4                                     | 4.68                                 | Intermediate                        | 0.98            | DOM                                    | 62                      | 214                        | 5                       |
| D   | f   | K12.2  | 145                                    | 17.3                                     | 1.83                                 |                                     | 0.61            | SUB                                    | 24                      | 125                        | 97                      |
| D   | f   | K2.1   | 200                                    | 19.2                                     | 0.70                                 |                                     | 0.22            | SUB                                    | 2                       | 21                         | 82                      |
| D   | f   | K24.1  | 193                                    | 21.8                                     | 2.53                                 |                                     | 0.51            | SUB                                    | 6                       | 101                        | 102                     |
| D   | f   | K26.3  | 152                                    | 19.7                                     | 4.76                                 |                                     | 0.98            | DOM                                    | 219                     | 86                         | 5                       |
| E   | m   | K10.6  | 204                                    | 22.9                                     | 9.88                                 | Intermediate                        | 1.00            | DOM                                    | 79                      | 121                        | 0                       |
| E   | m   | K13.6  | 200                                    | 22.3                                     | 12.69                                | High                                | 0.32            | SUB                                    | 2                       | 16                         | 38                      |
| E   | m   | K28.5  | 195                                    | 22.6                                     | 5.23                                 | Low                                 | 0.06            | SUB                                    | 0                       | 1                          | 17                      |
| E   | m   | K4.2   | 209                                    | 22.9                                     | 9.04                                 | Intermediate                        | 0.00            | SUB                                    | 0                       | 0                          | 0                       |
| E   | f   | K10.1  | 204                                    | 16.2                                     | 0.40                                 |                                     | 0.75            | SUB                                    | 39                      | 37                         | 25                      |
| E   | f   | K13.3  | 200                                    | 17.3                                     | 1.47                                 |                                     | 0.18            | SUB                                    | 2                       | 29                         | 143                     |
| E   | f   | K28.1  | 195                                    | 20.1                                     | 19.74                                |                                     | 0.98            | DOM                                    | 117                     | 71                         | 4                       |
| E   | f   | K4.1   | 209                                    | 19.1                                     | 3.39                                 |                                     | 0.87            | DOM                                    | 3                       | 106                        | 17                      |
| F   | m   | K11.5  | 204                                    | 22.2                                     | 6.41                                 | Intermediate                        | 0.00            | SUB                                    | 0                       | 0                          | 1                       |
| F   | m   | K26.4  | 152                                    | 22                                       | 28.99                                | High                                | 0.12            | SUB                                    | 0                       | 3                          | 23                      |
| F   | m   | K27.4  | 193                                    | 22.1                                     | 8.90                                 | Intermediate                        | 0.14            | SUB                                    | 2                       | 2                          | 25                      |
| F   | m   | K30.8  | 193                                    | 22.3                                     | 4.63                                 | Low                                 | 0.98            | DOM                                    | 124                     | 58                         | 3                       |
| F   | f   | K11.2  | 204                                    | 20                                       | 4.74                                 |                                     | 0.69            | SUB                                    | 4                       | 5                          | 4                       |
| F   | f   | K26.1  | 152                                    | 19.6                                     | 0.74                                 |                                     | 0.77            | SUB                                    | 14                      | 6                          | 6                       |
| F   | f   | K27.1  | 193                                    | 20.1                                     | 2.06                                 |                                     | 0.11            | SUB                                    | 3                       | 11                         | 114                     |
| F   | f   | K30.2  | 193                                    | 21.3                                     | 3.12                                 |                                     | 0.94            | DOM                                    | 45                      | 20                         | 4                       |
| G   | m   | K18.9  | 198                                    | 21.3                                     | 10.10                                | Intermediate                        | 0.40            | SUB                                    | 6                       | 34                         | 60                      |
| G   | m   | K21.6  | 159                                    | 21.6                                     | 1.54                                 | Low                                 | 0.43            | SUB                                    | 7                       | 30                         | 49                      |
| G   | m   | K3.3   | 208                                    | 21.9                                     | 5.70                                 | Intermediate                        | 0.98            | DOM                                    | 122                     | 30                         | 3                       |
| G   | m   | K8.2   | 204                                    | 21.5                                     | 12.19                                | High                                | 0.82            | DOM                                    | 64                      | 58                         | 26                      |
| G   | f   | K18.1  | 198                                    | 20.4                                     | 2.84                                 |                                     | 0.30            | SUB                                    | 0                       | 13                         | 31                      |
| G   | f   | K21.2  | 159                                    | 22.4                                     | 0.69                                 |                                     | 0.81            | DOM                                    | 10                      | 32                         | 10                      |
| G   | f   | K3.1   | 208                                    | 20.7                                     | 1.34                                 |                                     | 0.62            | SUB                                    | 6                       | 15                         | 13                      |
| G   | f   | K8.1   | 204                                    | 23.3                                     | 0.79                                 |                                     | 0.74            | SUB                                    | 2                       | 38                         | 14                      |
| H   | m   | K1.9   | 155                                    | 19.4                                     | 3.38                                 | Low                                 | 0.40            | SUB                                    | 1                       | 3                          | 6                       |
| H   | m   | K13.5  | 200                                    | 19.5                                     | 3.82                                 | Intermediate                        | 0.83            | DOM                                    | 21                      | 22                         | 9                       |
| H   | m   | K22.4  | 199                                    | 19.8                                     | 8.34                                 | Intermediate                        | 0.97            | DOM                                    | 41                      | 30                         | 2                       |
| H   | m   | K27.6  | 193                                    | 19.5                                     | 9.80                                 | High                                | 0.57            | SUB                                    | 0                       | 4                          | 3                       |
| H   | f   | K1.2   | 155                                    | 20.2                                     | 0.70                                 |                                     | 0.75            | SUB                                    | 0                       | 6                          | 2                       |
| H   | f   | K13.2  | 200                                    | 16.8                                     | 1.85                                 |                                     | 0.27            | SUB                                    | 3                       | 10                         | 36                      |
| H   | f   | K22.1  | 199                                    | 16.6                                     | 0.83                                 |                                     | 0.88            | DOM                                    | 47                      | 17                         | 9                       |
| H   | f   | K27.3  | 193                                    | 21.6                                     | 0.99                                 |                                     | 0.40            | SUB                                    | 2                       | 20                         | 33                      |
| lab | m   | K10.10 | 204                                    | 23.1                                     | 4.24                                 |                                     |                 |                                        |                         |                            |                         |
| lab | m   | K10.9  | 145                                    | 23.7                                     | 3.49                                 |                                     |                 |                                        |                         |                            |                         |
| lab | m   | K11.4  | 122                                    | 22.5                                     | 9.42                                 |                                     |                 |                                        |                         |                            |                         |
| lab | m   | K12.9  | 166                                    | 21.1                                     | 6.96                                 |                                     |                 |                                        |                         |                            |                         |
| lab | m   | K14.1  | 185                                    | 21.8                                     | 14.24                                |                                     |                 |                                        |                         |                            |                         |
| lab | m   | K14.2  | 158                                    | 25.8                                     | 7.16                                 |                                     |                 |                                        |                         |                            |                         |
| lab | m   | K14.3  | 158                                    | 23.5                                     | 4.96                                 |                                     |                 |                                        |                         |                            |                         |
| lab | m   | K16.3  | 199                                    | 22.4                                     | 5.67                                 |                                     |                 |                                        |                         |                            |                         |
| lab | m   | K16.4  | 159                                    | 24.2                                     | 4.87                                 |                                     |                 |                                        |                         |                            |                         |
| lab | m   | K17.2  | 159                                    | 23.2                                     | 8.02                                 |                                     |                 |                                        |                         |                            |                         |
| lab | m   | K17.3  | 166                                    | 23                                       | 4.58                                 |                                     |                 |                                        |                         |                            |                         |
| lab | m   | K18.15 | 103                                    | 16.9                                     | 3.32                                 |                                     |                 |                                        |                         |                            |                         |
| lab | m   | K18.16 | 193                                    | 25.6                                     | 3.83                                 |                                     |                 |                                        |                         |                            |                         |
| lab | m   | K19.7  | 165                                    | 27                                       | 4.76                                 |                                     |                 |                                        |                         |                            |                         |
| lab | m   | K20.2  | 184                                    | 20.2                                     | 4.57                                 |                                     |                 |                                        |                         |                            |                         |
| lab | m   | K21.12 | 202                                    | 21.9                                     | 3.20                                 |                                     |                 |                                        |                         |                            |                         |

|     |   |       |     |      |       |  |  |  |  |  |  |
|-----|---|-------|-----|------|-------|--|--|--|--|--|--|
| lab | m | K23.4 | 173 | 23.4 | 5.26  |  |  |  |  |  |  |
| lab | m | K24.7 | 174 | 23.2 | 11.54 |  |  |  |  |  |  |
| lab | m | K25.3 | 207 | 21.1 | 6.31  |  |  |  |  |  |  |
| lab | m | K25.5 | 164 | 24.6 | 7.00  |  |  |  |  |  |  |
| lab | m | K26.5 | 185 | 22.3 | 5.95  |  |  |  |  |  |  |
| lab | m | K27.5 | 192 | 25.9 | 14.63 |  |  |  |  |  |  |
| lab | m | K28.3 | 195 | 26.9 | 4.99  |  |  |  |  |  |  |
| lab | m | K3.8  | 187 | 18.4 | 7.13  |  |  |  |  |  |  |
| lab | m | K30.7 | 192 | 24.2 | 4.06  |  |  |  |  |  |  |
| lab | m | K4.9  | 195 | 22.2 | 23.48 |  |  |  |  |  |  |
| lab | m | K5.2  | 195 | 23.1 | 3.79  |  |  |  |  |  |  |
| lab | m | K5.3  | 180 | 25.9 | 13.99 |  |  |  |  |  |  |
| lab | m | K7.4  | 202 | 24.7 | 9.71  |  |  |  |  |  |  |
| lab | m | K7.6  | 193 | 18.7 | 13.06 |  |  |  |  |  |  |
| lab | m | K8.3  | 202 | 27.7 | 4.29  |  |  |  |  |  |  |
| lab | m | K9.3  | 193 | 24.3 | 5.23  |  |  |  |  |  |  |
| lab | f | K1.3  | 155 | 16.9 | 1.54  |  |  |  |  |  |  |
| lab | f | K10.3 | 204 | 20.5 | 1.62  |  |  |  |  |  |  |
| lab | f | K11.1 | 200 | 16.8 | 2.33  |  |  |  |  |  |  |
| lab | f | K12.1 | 192 | 18.8 | 1.76  |  |  |  |  |  |  |
| lab | f | K13.1 | 166 | 16.2 | 1.64  |  |  |  |  |  |  |
| lab | f | K14.7 | 158 | 18.6 | 2.50  |  |  |  |  |  |  |
| lab | f | K16.1 | 159 | 18.1 | 2.24  |  |  |  |  |  |  |
| lab | f | K17.8 | 166 | 21.4 | 1.63  |  |  |  |  |  |  |
| lab | f | K17.9 | 152 | 19.8 | 1.66  |  |  |  |  |  |  |
| lab | f | K20.1 | 165 | 20   | 1.51  |  |  |  |  |  |  |
| lab | f | K20.6 | 207 | 19.5 | 1.90  |  |  |  |  |  |  |
| lab | f | K20.7 | 180 | 19.7 | 1.47  |  |  |  |  |  |  |
| lab | f | K20.8 | 180 | 21.3 | 1.75  |  |  |  |  |  |  |
| lab | f | K21.3 | 178 | 20.6 | 2.01  |  |  |  |  |  |  |
| lab | f | K22.3 | 178 | 17.2 | 2.02  |  |  |  |  |  |  |
| lab | f | K23.8 | 131 | 15.1 | 1.46  |  |  |  |  |  |  |
| lab | f | K23.9 | 164 | 21.3 | 1.43  |  |  |  |  |  |  |
| lab | f | K25.8 | 193 | 19.3 | 1.46  |  |  |  |  |  |  |
| lab | f | K25.9 | 174 | 18.3 | 1.75  |  |  |  |  |  |  |
| lab | f | K26.2 | 204 | 19.6 | 1.46  |  |  |  |  |  |  |
| lab | f | K26.7 | 198 | 19.3 | 2.52  |  |  |  |  |  |  |
| lab | f | K27.2 | 196 | 17.3 | 1.55  |  |  |  |  |  |  |
| lab | f | K27.7 | 201 | 19.7 | 1.69  |  |  |  |  |  |  |
| lab | f | K28.8 | 202 | 20.9 | 1.85  |  |  |  |  |  |  |
| lab | f | K4.4  | 152 | 18.8 | 2.40  |  |  |  |  |  |  |
| lab | f | K5.1  | 145 | 20   | 1.74  |  |  |  |  |  |  |
| lab | f | K5.5  | 201 | 29.7 | 1.65  |  |  |  |  |  |  |
| lab | f | K5.6  | 198 | 21.2 | 2.93  |  |  |  |  |  |  |
| lab | f | K7.2  | 204 | 20.1 | 1.79  |  |  |  |  |  |  |
| lab | f | K8.7  | 207 | 21.2 | 2.97  |  |  |  |  |  |  |
| lab | f | K8.8  | 201 | 23.1 | 1.98  |  |  |  |  |  |  |
| lab | f | K9.5  | 184 | 21.9 | 9.84  |  |  |  |  |  |  |

Table S2. Mouse urinary compounds selected for targeted approach GCMS analysis

| Substance name                      | Function                                    | Reference                   | Previously found in mouse urine by                          |
|-------------------------------------|---------------------------------------------|-----------------------------|-------------------------------------------------------------|
| Trimethylamine                      | male-only compound                          | Liberles & Buck 2006        | Röck et al 2006                                             |
| Isovaleraldehyde                    | flavor agent                                |                             | Röck et al 2006                                             |
| 2-Pentanone                         | flavor agent                                |                             | Röck et al 2006                                             |
| Isopentylamine                      | food derivative                             |                             |                                                             |
| 3-Penten-2-one                      | NA                                          |                             | Röck et al 2006                                             |
| 6-hydroxy-6-methyl-3-heptanone      | male pheromone                              | Novotny et al 1999a,b       | Röck et al 2006                                             |
| 6-Methyl-3,5-heptadien-2-one        | flavor agent                                |                             |                                                             |
| 1-Methylthio-2-propanone            | flavor agent                                |                             |                                                             |
| 3-Methylcyclopentanone              | NA                                          |                             | Schwende et al 1986, Novotny et al 1999a,b, Röck et al 2006 |
| 5-Methyl-2-hexanone                 | food derivative                             |                             |                                                             |
| 2-Heptanone                         | male pheromone                              | Novotny et al 1987          | Schwende et al 1986, Röck et al 2006                        |
| 2-Heptanone                         | stress signal in rats                       | Gutierrez-Garcia et al 2007 |                                                             |
| 4-Hepten-2-one                      | food derivative                             |                             | Schwende et al 1986                                         |
| 2,5-Dimethylpyrazine                | flavor agent                                |                             |                                                             |
| (Z)-2-penten-1-yl acetate           | flavor agent                                |                             | Schwende et al 1986                                         |
| Dimethyl sulfone                    | food derivative                             |                             |                                                             |
| 2-Acetyl-1-pyrroline                | flavor agent                                |                             |                                                             |
| 3-Hepten-2-one                      | flavor agent                                |                             | Röck et al 2006                                             |
| 4-Methyl-6-hepten-3-one             | NA                                          |                             |                                                             |
| 2-Isopropyl-4,5-dihydrothiazole     | structurally very similar to male pheromone |                             | Liebich et al 1977, Schwende et al 1986                     |
| 3-Octen-2-one (T)                   | flavor agent                                |                             |                                                             |
| 2-Hexen-4-olide (T)                 | flavor agent                                |                             |                                                             |
| Dihydroisophorone (T)               | flavor agent                                |                             |                                                             |
| 3,4-Dehydro-exo-brevicommin (DHB)   | male pheromone                              | Novotny et al 1999b         | Schwende et al 1986, Röck et al 2006                        |
| 2-sec-Butyl-4,5-dihydrothiazole     | male pheromone                              | Novotny et al 1999b         | Liebich et al 1977, Schwende et al 1986, Röck et al 2006    |
| 5,9-dimethyldeca-5,8-dien-2-one     | flavor agent                                |                             |                                                             |
| (Z)-5-Tetradecen-1-ol               | saw fly pheromone                           | Bartelt et al 1983          |                                                             |
| Triacetin                           | flavor agent                                |                             |                                                             |
| 2-Butyl-2-octenal                   | ant alarm pheromone                         | Rossi et al 1992            |                                                             |
| Farnesene                           | male pheromone                              | Novotny et al 1999b         | Röck et al 2006                                             |
| 4-sec-Butyl-2,6-di-tert-butylphenol | food derivative                             |                             |                                                             |

Table S3. Details of SPLS-DA classification models and their misclassification rates

| Model                                 | Data source | Classification model                           | Substances sampled         | # of selected compounds | Misclassification rate | # significant compounds | Differentiating compounds      |
|---------------------------------------|-------------|------------------------------------------------|----------------------------|-------------------------|------------------------|-------------------------|--------------------------------|
| 1                                     | SWATH       | Protein amount before experiment               | MUPs                       | 0                       | 8/17                   | 0                       | -                              |
| 2                                     | SWATH       | Relative intensity before experiment           | MUPs                       | 3                       | 4/17                   | 0                       | see S1 Table 10A               |
| 3                                     | SWATH       | Protein amount before experiment               | non-MUPs                   | 0                       | 5/17                   | 0                       | -                              |
| 4                                     | SWATH       | Relative intensity before experiment           | non-MUPs                   | 0                       | 10/17                  | 0                       | -                              |
| 5                                     | SWATH       | Protein amount during experiment               | MUPs                       | 0                       | 8/17                   | 0                       | -                              |
| 6                                     | SWATH       | Relative intensity during experiment           | MUPs                       | 0                       | 2/17                   | 0                       | -                              |
| 7                                     | SWATH       | Protein amount during experiment               | non-MUPs                   | 0                       | 5/17                   | 0                       | -                              |
| 8                                     | SWATH       | Relative intensity during experiment           | non-MUPs                   | 3                       | 6/17                   | 0                       | see S1 Table 10B               |
| 9                                     | SWATH       | Protein amount during vs before experiment     | MUPs                       | 6                       | 0/17                   | 6                       | see S1 Table 10C               |
| 10                                    | SWATH       | Relative intensity during vs before experiment | MUPs                       | 0                       | 5/17                   | 0                       | -                              |
| 11                                    | SWATH       | Protein amount during vs before experiment     | non-MUPs                   | 115                     | 0/17                   | 105                     | see S1 Table 10E               |
| 12                                    | SWATH       | Relative intensity during vs before experiment | non-MUPs                   | 43                      | 0/17                   | 26                      | see S1 Table 10D               |
| 13                                    | SWATH       | Fold change in protein amount                  | MUPs                       | 0                       | 5/17                   | 0                       | -                              |
| 14                                    | SWATH       | Fold change in relative intensity              | MUPs                       | 0                       | 8/17                   | 0                       | -                              |
| 15                                    | SWATH       | Fold change in protein amount                  | non-MUPs                   | 0                       | 5/17                   | 0                       | -                              |
| 16                                    | SWATH       | Fold change in relative intensity              | non-MUPs                   | 0                       | 8/17                   | 0                       | -                              |
| 1. Exploratory data analysis          |             |                                                |                            |                         |                        |                         |                                |
| 17                                    | GCMS        | Male social status - intact urine              | volatile organic compounds | 9                       | 1/17                   | 0                       | -                              |
| 18                                    | GCMS        | Male social status - denatured urine           | volatile organic compounds | 52                      | 0/17                   | 0                       | -                              |
| 19                                    | GCMS        | Female social status - intact urine            | volatile organic compounds | 68                      | 2/10                   | 0                       | -                              |
| 20                                    | GCMS        | Female social status - denatured urine         | volatile organic compounds | 399                     | 1/10                   | 0                       | -                              |
| 2. Targeted approach (see S1 Table 2) |             |                                                |                            |                         |                        |                         |                                |
| 21                                    | GCMS        | Male social status - intact urine              | volatile organic compounds | 3                       | 1/17                   | 1                       | HMH                            |
| 22                                    | GCMS        | Male social status - denatured urine           | volatile organic compounds | 7                       | 1/17                   | 3                       | HMH                            |
| 23                                    | GCMS        | Female social status - intact urine            | volatile organic compounds | 2                       | 3/10                   | 0                       | -                              |
| 24                                    | GCMS        | Female social status - denatured urine         | volatile organic compounds | 13                      | 1/10                   | 0                       | -                              |
| 25                                    | GCMS        | Housing conditions - Males - intact urine      | volatile organic compounds | 7                       | 1/25                   | 3                       | SBT, Isopentylamine, Pentanone |
| 26                                    | GCMS        | Housing conditions - Males - denatured urine   | volatile organic compounds | 10                      | 1/25                   | 1                       | Octen-2-one                    |
| 27                                    | GCMS        | Housing conditions - females - intact urine    | volatile organic compounds | 3                       | 3/15                   | 0                       | -                              |
| 28                                    | GCMS        | Housing conditions - females - denatured urine | volatile organic compounds | 6                       | 2/15                   | 1                       | Heptanone                      |

Table S4.A. LME model for effects of social status and Enclosure phase on male urinary protein excretion (log transformed PC ratio)

**FULL MODEL**

| Fixed effect                         | numDF | denDF | F value | p value |
|--------------------------------------|-------|-------|---------|---------|
| <b>(Intercept)</b>                   | 1     | 245   | 8.11    | 0.005   |
| <b>Social status</b>                 | 2     | 245   | 9.94    | 0.0001  |
| <b>Enclosure phase</b>               | 2     | 245   | 4.02    | 0.019   |
| Age                                  | 1     | 245   | 0.27    | 0.60    |
| Mass                                 | 1     | 245   | 0.63    | 0.43    |
| <b>Social status*Enclosure phase</b> | 4     | 245   | 4.32    | 0.002   |

**POSTHOC TESTS**

| Factor: enclosure phase | Comparison         | Estimate     | Std. Error   | z value      | p value      |
|-------------------------|--------------------|--------------|--------------|--------------|--------------|
| Before enclosure        | DOM vs SUB         | 0.020        | 0.186        | 0.106        | 1.00         |
|                         | DOM vs CTRL        | 0.052        | 0.164        | 0.317        | 1.00         |
|                         | SUB vs CTRL        | 0.032        | 0.145        | 0.223        | 1.00         |
| During enclosure        | <b>DOM vs SUB</b>  | <b>0.792</b> | <b>0.214</b> | <b>3.706</b> | <b>0.006</b> |
|                         | <b>DOM vs CTRL</b> | <b>0.562</b> | <b>0.145</b> | <b>3.881</b> | <b>0.003</b> |
|                         | SUB vs CTRL        | -0.230       | 0.194        | -1.184       | 0.95         |
| After enclosure         | DOM vs SUB         | 0.216        | 0.342        | -0.632       | 0.99         |
|                         | DOM vs CTRL        | -0.036       | 0.206        | -0.173       | 1.00         |
|                         | SUB vs CTRL        | -0.252       | 0.309        | -0.814       | 0.99         |

| Factor: social status | Comparison              | Estimate     | Std. Error   | z value      | p value           |
|-----------------------|-------------------------|--------------|--------------|--------------|-------------------|
| Dominant males        | <b>During vs before</b> | <b>0.762</b> | <b>0.146</b> | <b>5.204</b> | <b>&lt; 0.001</b> |
|                       | After vs during         | -0.223       | 0.183        | -1.219       | 0.94              |
|                       | After vs before         | 0.540        | 0.196        | 2.757        | 0.11              |
| Subordinate males     | During vs before        | -0.011       | 0.195        | -0.054       | 1.00              |
|                       | After vs during         | 0.354        | 0.306        | 1.155        | 0.96              |
|                       | After vs before         | 0.343        | 0.301        | 1.141        | 0.96              |
| Cage control males    | <b>During vs before</b> | <b>0.252</b> | <b>0.078</b> | <b>3.249</b> | <b>0.026</b>      |
|                       | <b>After vs during</b>  | <b>0.375</b> | <b>0.098</b> | <b>3.844</b> | <b>0.003</b>      |
|                       | <b>After vs before</b>  | <b>0.627</b> | <b>0.103</b> | <b>6.091</b> | <b>&lt; 0.001</b> |

Table S4.B. LME model for effects of social status and enclosure phase on male total urinary protein excretion

**FULL MODEL**

| Fixed effect                        | numDF    | denDF      | F value      | p value           |
|-------------------------------------|----------|------------|--------------|-------------------|
| <b>(Intercept)</b>                  | <b>1</b> | <b>245</b> | <b>24.35</b> | <b>&lt;0.0001</b> |
| <b>Social status</b>                | <b>2</b> | <b>245</b> | <b>5.19</b>  | <b>0.006</b>      |
| <b>Enclosure phase</b>              | <b>2</b> | <b>245</b> | <b>30.63</b> | <b>&lt;0.0001</b> |
| <b>Age</b>                          | <b>1</b> | <b>245</b> | <b>5.43</b>  | <b>0.021</b>      |
| Mass                                | 1        | 245        | 0.01         | 0.91              |
| <b>Social status*Enclosure phas</b> | <b>4</b> | <b>245</b> | <b>8.79</b>  | <b>&lt;0.0001</b> |

**POSTHOC TESTS**

| Factor: enclosure phase | Comparison         | Estimate      | Std. Error   | z value       | p value      |
|-------------------------|--------------------|---------------|--------------|---------------|--------------|
| Before enclosure        | DOM vs SUB         | 0.235         | 0.246        | 0.956         | 0.99         |
|                         | DOM vs CTRL        | -0.468        | 0.238        | -1.967        | 0.54         |
|                         | <b>SUB vs CTRL</b> | <b>-0.703</b> | <b>0.195</b> | <b>-3.592</b> | <b>0.009</b> |
| During enclosure        | DOM vs SUB         | -0.088        | 0.273        | -0.325        | 1.00         |
|                         | DOM vs CTRL        | 0.577         | 0.203        | 2.839         | 0.09         |
|                         | SUB vs CTRL        | 0.666         | 0.248        | 2.686         | 0.14         |
| After enclosure         | DOM vs SUB         | -0.588        | 0.447        | -1.314        | 0.92         |
|                         | DOM vs CTRL        | -0.730        | 0.313        | -2.330        | 0.30         |
|                         | SUB vs CTRL        | -0.141        | 0.405        | -0.350        | 0.99         |

| Factor: social status | Comparison              | Estimate     | Std. Error   | z value      | p value           |
|-----------------------|-------------------------|--------------|--------------|--------------|-------------------|
| Dominant males        | <b>During vs before</b> | <b>1.626</b> | <b>0.224</b> | <b>7.243</b> | <b>&lt; 0.001</b> |
|                       | After vs during         | 0.033        | 0.279        | 0.119        | 1.00              |
|                       | <b>After vs before</b>  | <b>1.659</b> | <b>0.299</b> | <b>5.534</b> | <b>&lt; 0.001</b> |
| Subordinate males     | <b>During vs before</b> | <b>1.950</b> | <b>0.243</b> | <b>7.996</b> | <b>&lt; 0.001</b> |
|                       | After vs during         | 0.532        | 0.388        | 1.371        | 0.90              |
|                       | <b>After vs before</b>  | <b>2.483</b> | <b>0.378</b> | <b>6.559</b> | <b>&lt; 0.001</b> |
| Cage control males    | <b>During vs before</b> | <b>0.580</b> | <b>0.151</b> | <b>3.842</b> | <b>0.003</b>      |
|                       | <b>After vs during</b>  | <b>1.341</b> | <b>0.190</b> | <b>7.045</b> | <b>&lt; 0.001</b> |
|                       | <b>After vs before</b>  | <b>1.921</b> | <b>0.200</b> | <b>9.571</b> | <b>&lt; 0.001</b> |



Table S4.C. LME model for effects of social status and enclosure phase on male creatinine excretion (log transformed)

**FULL MODEL**

| Fixed effect                         | numDF    | denDF      | F value      | p value           |
|--------------------------------------|----------|------------|--------------|-------------------|
| <b>(Intercept)</b>                   | <b>1</b> | <b>245</b> | <b>73.67</b> | <b>&lt;0.0001</b> |
| <b>Social status</b>                 | <b>2</b> | <b>245</b> | <b>4.32</b>  | <b>0.014</b>      |
| Enclosure phase                      | 2        | 245        | 0.23         | 0.80              |
| Age                                  | 1        | 245        | 0.30         | 0.58              |
| Mass                                 | 1        | 245        | 0.13         | 0.71              |
| <b>Social status*Enclosure phase</b> | <b>4</b> | <b>245</b> | <b>2.75</b>  | <b>0.029</b>      |

**POSTHOC TESTS**

| Factor: enclosure phase | Comparison  | Estimate | Std. Error | z value | p value |
|-------------------------|-------------|----------|------------|---------|---------|
| Before enclosure        | DOM vs SUB  | 0.112    | 0.222      | 0.506   | 1.00    |
|                         | DOM vs CTRL | -0.233   | 0.203      | -1.144  | 0.96    |
|                         | SUB vs CTRL | -0.345   | 0.172      | -2.000  | 0.51    |
| During enclosure        | DOM vs SUB  | -0.725   | 0.248      | -2.922  | 0.07    |
|                         | DOM vs CTRL | -0.362   | 0.181      | -2.005  | 0.50    |
|                         | SUB vs CTRL | 0.363    | 0.224      | 1.618   | 0.77    |
| After enclosure         | DOM vs SUB  | -0.358   | 0.389      | -0.920  | 0.99    |
|                         | DOM vs CTRL | -0.127   | 0.254      | -0.499  | 1.00    |
|                         | SUB vs CTRL | 0.231    | 0.348      | 0.664   | 1.00    |

| Factor: social status | Comparison              | Estimate     | Std. Error   | z value      | p value      |
|-----------------------|-------------------------|--------------|--------------|--------------|--------------|
| Dominant males        | During vs before        | -0.108       | 0.177        | -0.612       | 1.00         |
|                       | After vs during         | 0.254        | 0.221        | 1.151        | 0.96         |
|                       | After vs before         | 0.146        | 0.237        | 0.616        | 1.00         |
| Subordinate males     | <b>During vs before</b> | <b>0.729</b> | <b>0.217</b> | <b>3.366</b> | <b>0.019</b> |
|                       | After vs during         | -0.113       | 0.333        | -0.341       | 1.00         |
|                       | After vs before         | 0.616        | 0.330        | 1.867        | 0.60         |
| Cage control males    | During vs before        | 0.021        | 0.099        | 0.215        | 1.00         |
|                       | After vs during         | 0.018        | 0.125        | 0.148        | 1.00         |
|                       | After vs before         | 0.040        | 0.132        | 0.302        | 1.00         |

Table S5.A. LME model for effects of social status and enclosure phase on female PC ratio (log transformed)

**FULL MODEL**

| Fixed effect                         | numDF    | denDF      | F value      | p value           |
|--------------------------------------|----------|------------|--------------|-------------------|
| <b>(Intercept)</b>                   | <b>1</b> | <b>288</b> | <b>4.41</b>  | <b>0.037</b>      |
| <b>Social status</b>                 | <b>2</b> | <b>288</b> | <b>3.10</b>  | <b>0.046</b>      |
| <b>Enclosure phase</b>               | <b>2</b> | <b>288</b> | <b>11.75</b> | <b>&lt;0.0001</b> |
| Age                                  | 1        | 288        | 0.004        | 0.95              |
| Mass                                 | 1        | 288        | 0.11         | 0.74              |
| <b>Social status*Enclosure phase</b> | <b>4</b> | <b>288</b> | <b>3.50</b>  | <b>0.008</b>      |

**POSTHOC TESTS**

| Factor: enclosure phase | Comparison  | Estimate | Std. Error | z value | p value |
|-------------------------|-------------|----------|------------|---------|---------|
| Before enclosure        | DOM vs SUB  | 0.164    | 0.204      | 0.805   | 0.99    |
|                         | DOM vs CTRL | 0.008    | 0.194      | 0.039   | 1.00    |
|                         | SUB vs CTRL | -0.156   | 0.145      | -1.081  | 0.97    |
| During enclosure        | DOM vs SUB  | -0.208   | 0.171      | -1.221  | 0.95    |
|                         | DOM vs CTRL | 0.119    | 0.163      | 0.733   | 0.99    |
|                         | SUB vs CTRL | 0.328    | 0.133      | 2.473   | 0.22    |
| After enclosure         | DOM vs SUB  | 0.059    | 0.270      | 0.218   | 1.00    |
|                         | DOM vs CTRL | -0.196   | 0.248      | -0.793  | 0.99    |
|                         | SUB vs CTRL | -0.255   | 0.198      | -1.289  | 0.93    |

| Factor: social status | Comparison              | Estimate     | Std. Error   | z value      | p value           |
|-----------------------|-------------------------|--------------|--------------|--------------|-------------------|
| Dominant males        | During vs before        | 0.134        | 0.186        | 0.724        | 0.99              |
|                       | After vs during         | 0.329        | 0.231        | 1.425        | 0.87              |
|                       | After vs before         | 0.463        | 0.246        | 1.887        | 0.59              |
| Subordinate males     | <b>During vs before</b> | <b>0.507</b> | <b>0.126</b> | <b>4.017</b> | <b>0.002</b>      |
|                       | After vs during         | 0.062        | 0.169        | 0.366        | 0.99              |
|                       | <b>After vs before</b>  | <b>0.569</b> | <b>0.175</b> | <b>3.252</b> | <b>0.028</b>      |
| Cage control males    | During vs before        | 0.023        | 0.090        | 0.252        | 1.00              |
|                       | <b>After vs during</b>  | <b>0.645</b> | <b>0.115</b> | <b>5.586</b> | <b>&lt; 0.001</b> |
|                       | <b>After vs before</b>  | <b>0.667</b> | <b>0.122</b> | <b>5.460</b> | <b>&lt; 0.001</b> |

Table S5.B. LME model for effects of social status and enclosure phase on female total urinary protein production

**FULL MODEL**

| Fixed effect                         | numDF    | denDF      | F value      | p value           |
|--------------------------------------|----------|------------|--------------|-------------------|
| <b>(Intercept)</b>                   | <b>1</b> | <b>288</b> | <b>7.99</b>  | <b>0.005</b>      |
| <b>Social status</b>                 | <b>2</b> | <b>288</b> | <b>17.77</b> | <b>&lt;0.0001</b> |
| <b>Enclosure phase</b>               | <b>2</b> | <b>288</b> | <b>4.17</b>  | <b>0.016</b>      |
| Age                                  | 1        | 288        | 1.80         | 0.18              |
| Mass                                 | 1        | 288        | 1.70         | 0.19              |
| <b>Social status*Enclosure phase</b> | <b>4</b> | <b>288</b> | <b>10.45</b> | <b>&lt;0.0001</b> |

**POSTHOC TESTS**

| Factor: enclosure phase | Comparison         | Estimate     | Std. Error   | z value      | p value         |
|-------------------------|--------------------|--------------|--------------|--------------|-----------------|
| Before enclosure        | DOM vs SUB         | 0.003        | 0.082        | 0.043        | 1.00            |
|                         | DOM vs CTRL        | -0.075       | 0.076        | -0.987       | 0.99            |
|                         | SUB vs CTRL        | -0.079       | 0.055        | -1.438       | 0.88            |
| During enclosure        | DOM vs SUB         | -0.037       | 0.068        | -0.553       | 0.99            |
|                         | <b>DOM vs CTRL</b> | <b>0.246</b> | <b>0.064</b> | <b>3.842</b> | <b>&lt;0.01</b> |
|                         | <b>SUB vs CTRL</b> | <b>0.283</b> | <b>0.050</b> | <b>5.635</b> | <b>&lt;0.01</b> |
| After enclosure         | DOM vs SUB         | -0.001       | 0.110        | -0.002       | 1.00            |
|                         | DOM vs CTRL        | 0.106        | 0.099        | 1.074        | 0.97            |
|                         | SUB vs CTRL        | 0.106        | 0.076        | 1.395        | 0.89            |

| Factor: social status | Comparison              | Estimate     | Std. Error   | z value      | p value         |
|-----------------------|-------------------------|--------------|--------------|--------------|-----------------|
| Dominant males        | <b>During vs before</b> | <b>0.336</b> | <b>0.077</b> | <b>4.314</b> | <b>&lt;0.01</b> |
|                       | After vs during         | -0.024       | 0.096        | -0.249       | 1.00            |
|                       | After vs before         | 0.312        | 0.103        | 3.025        | 0.06            |
| Subordinate males     | <b>During vs before</b> | <b>0.377</b> | <b>0.051</b> | <b>7.404</b> | <b>&lt;0.01</b> |
|                       | After vs during         | -0.061       | 0.068        | -0.903       | 0.99            |
|                       | <b>After vs before</b>  | <b>0.315</b> | <b>0.070</b> | <b>4.466</b> | <b>&lt;0.01</b> |
| Cage control males    | During vs before        | 0.014        | 0.032        | 0.436        | 1.00            |
|                       | After vs during         | 0.115        | 0.042        | 2.742        | 0.12            |
|                       | After vs before         | 0.129        | 0.044        | 2.911        | 0.08            |

Table S5.C. LME model for effects of social status and enclosure phase on female creatinine excretion (log transformed)

**FULL MODEL**

| Fixed effect                  | numDF    | denDF      | F value      | p value           |
|-------------------------------|----------|------------|--------------|-------------------|
| <b>(Intercept)</b>            | <b>1</b> | <b>288</b> | <b>77.39</b> | <b>&lt;0.0001</b> |
| Social status                 | 2        | 288        | 1.15         | 0.32              |
| Enclosure phase               | 2        | 288        | 1.63         | 0.20              |
| Age                           | 1        | 288        | 0.21         | 0.65              |
| Mass                          | 1        | 288        | 1.36         | 0.24              |
| Social status*Enclosure phase | 4        | 288        | 1.70         | 0.15              |

**POSTHOC TESTS**

| Factor: Enclosure phase | Comparison  | Estimate | Std. Error | z value | p value |
|-------------------------|-------------|----------|------------|---------|---------|
| Before enclosure        | DOM vs SUB  | -0.078   | 0.236      | -0.331  | 1.00    |
|                         | DOM vs CTRL | -0.143   | 0.272      | -0.525  | 1.00    |
|                         | SUB vs CTRL | -0.065   | 0.224      | -0.289  | 1.00    |
| During enclosure        | DOM vs SUB  | 0.133    | 0.197      | 0.673   | 1.00    |
|                         | DOM vs CTRL | 0.409    | 0.242      | 1.690   | 0.72    |
|                         | SUB vs CTRL | 0.276    | 0.213      | 1.298   | 0.92    |
| After enclosure         | DOM vs SUB  | -0.113   | 0.310      | -0.363  | 1.00    |
|                         | DOM vs CTRL | 0.297    | 0.329      | 0.903   | 0.99    |
|                         | SUB vs CTRL | 0.410    | 0.275      | 1.493   | 0.84    |

| Factor: social status | Comparison       | Estimate | Std. Error | z value | p value |
|-----------------------|------------------|----------|------------|---------|---------|
| Dominant males        | During vs before | 0.470    | 0.215      | 2.186   | 0.38    |
|                       | After vs during  | -0.451   | 0.267      | -1.685  | 0.72    |
|                       | After vs before  | 0.020    | 0.284      | 0.069   | 1.00    |
| Subordinate males     | During vs before | 0.259    | 0.138      | 1.871   | 0.60    |
|                       | After vs during  | -0.205   | 0.186      | -1.103  | 0.97    |
|                       | After vs before  | 0.054    | 0.192      | 0.282   | 1.00    |
| Cage control males    | During vs before | -0.082   | 0.121      | -0.676  | 1.00    |
|                       | After vs during  | -0.339   | 0.155      | -2.191  | 0.37    |
|                       | After vs before  | -0.421   | 0.164      | -2.566  | 0.18    |

Table S6. Comparison of body mass parameters of dominant and subordinate mice (Mann-Whitney U tests)

| Variable                                             | Mean (SEM) of dominant mice (g) | Mean (SEM) of subordinate mice (g) | U   | Sig. (2-tailed) |
|------------------------------------------------------|---------------------------------|------------------------------------|-----|-----------------|
| Female initial mass                                  | 21.1 (1.03)                     | 20.1 (0.52)                        | 104 | 0.55            |
| Male initial mass                                    | 22.9 (0.69)                     | 23.7 (1.15)                        | 119 | 0.85            |
| Male mean mass (during enclosure)                    | 23.4 (0.41)                     | 23.0 (0.50)                        | 25  | 0.50            |
| Male $\Delta$ mass (enclosure end - enclosure start) | 0.27 (0.40)                     | -0.14 (0.75)                       | 27  | 0.63            |

Table S7.A. GLMM results of sex and housing on urinary protein excretion.

| Model parameter | PC Ratio |         |  | Total Protein |         |  | Creatinine |         |  |
|-----------------|----------|---------|--|---------------|---------|--|------------|---------|--|
|                 | $\chi^2$ | p       |  | $\chi^2$      | p       |  | $\chi^2$   | p       |  |
| Sex             | 67.8     | < 0.001 |  | 392.6         | < 0.001 |  | 22.4       | < 0.001 |  |
| Housing         | 5.2      | 0.02    |  | 12.5          | < 0.001 |  | 1.1        | 0.30    |  |
| Sex*Housing     | 2.3      | 0.13    |  | 28.1          | < 0.001 |  | 2.0        | 0.16    |  |

Table S7.B. Sexual dimorphism of urinary protein excretion under seminatural vs caged-control housing conditions.

| Housing       | PC Ratio (Mean (SEM)) |             |           | Total Protein mg/mL (Mean (SEM)) |             |           | Creatinine mg/mL (Mean (SEM)) |             |           |
|---------------|-----------------------|-------------|-----------|----------------------------------|-------------|-----------|-------------------------------|-------------|-----------|
|               | Male                  | Female      | M:F ratio | Male                             | Female      | M:F ratio | Male                          | Female      | M:F ratio |
| Caged-control | 10.67 (0.76)          | 2.80 (0.24) | 3.81      | 2.91 (0.10)                      | 0.44 (0.03) | 6.61      | 0.39 (0.03)                   | 0.22 (0.02) | 1.77      |
| Seminatural   | 15.50 (1.57)          | 3.64 (0.27) | 4.26      | 3.52 (0.15)                      | 0.71 (0.03) | 4.96      | 0.38 (0.04)                   | 0.27 (0.02) | 1.41      |

Table S8.A. Comparing behavioral preferences for urine and water in Y-maze to null expectations. Hypothesis testing performed using one sample t-test. Non-normal data tested using wilcoxon sign rank tests

| Positive Control Experiment: ( $\Delta$ =Urine-Water), parametric variables |       |    |                 |                       |                     | 95% Confidence Interval of the Difference |       |
|-----------------------------------------------------------------------------|-------|----|-----------------|-----------------------|---------------------|-------------------------------------------|-------|
| Behavior                                                                    | t     | df | Sig. (2-tailed) | Sig. after correction | Mean Difference (s) | Lower                                     | Upper |
| $\Delta$ Cumulative duration                                                | 3.04  | 14 | 0.009           | 0.033                 | 20.41               | 6.00                                      | 34.81 |
| $\Delta$ Cumulative latency                                                 | -2.69 | 14 | 0.018           | 0.045                 | -44.69              | -80.40                                    | -8.99 |
| $\Delta$ Chamber duration                                                   | 2.96  | 14 | 0.010           | 0.033                 | 17.43               | 4.81                                      | 30.04 |
| $\Delta$ Chamber latency                                                    | -1.96 | 13 | 0.072           | 0.120                 | -43.97              | -92.45                                    | 4.51  |
| $\Delta$ Branch duration                                                    | 1.58  | 14 | 0.137           | 0.171                 | 2.98                | -1.07                                     | 7.02  |
| $\Delta$ Sniffing duration                                                  | -0.84 | 12 | 0.419           | 0.419                 | -2.17               | -7.82                                     | 3.48  |
| $\Delta$ Sniffing latency                                                   | -0.96 | 12 | 0.354           | 0.393                 | -22.45              | -73.17                                    | 28.28 |

nonparametric variables

| Behavior                   | v  | Sig. (2-tailed) | Sig. after correction | Median |
|----------------------------|----|-----------------|-----------------------|--------|
| $\Delta$ Cumulative visits | 97 | 0.005           | 0.033                 | 1      |
| $\Delta$ Chamber visits    | 68 | 0.024           | 0.048                 | 2      |
| $\Delta$ Sniffing visits   | 10 | 0.098           | 0.140                 | 0.5    |

Table S8.B. Comparing behavioral preferences for male and female urine in Y-maze to null expectations.

| Sex Discrimination: ( $\Delta$ =Male-Female), parametric variables |       |    |                 |                       |                     | 95% Confidence Interval of the Difference |        |
|--------------------------------------------------------------------|-------|----|-----------------|-----------------------|---------------------|-------------------------------------------|--------|
| Behavior                                                           | t     | df | Sig. (2-tailed) | Sig. after correction | Mean Difference (s) | Lower                                     | Upper  |
| $\Delta$ Cumulative duration                                       | 0.81  | 9  | 0.440           | 0.957                 | 5.52                | -9.94                                     | 20.98  |
| $\Delta$ Cumulative latency                                        | -3.91 | 9  | 0.004           | 0.040                 | -40.11              | -63.30                                    | -16.93 |
| $\Delta$ Chamber duration                                          | 0.93  | 9  | 0.379           | 0.957                 | 5.74                | -8.29                                     | 19.77  |
| $\Delta$ Chamber latency                                           | -0.06 | 9  | 0.957           | 0.957                 | -1.53               | -64.24                                    | 61.18  |
| $\Delta$ Branch duration                                           | -0.10 | 9  | 0.925           | 0.957                 | -0.22               | -5.44                                     | 4.99   |
| $\Delta$ Sniffing duration                                         | 0.61  | 8  | 0.559           | 0.957                 | 0.93                | -2.60                                     | 4.47   |
| $\Delta$ Sniffing latency                                          | 0.11  | 8  | 0.917           | 0.957                 | 3.57                | -73.26                                    | 80.39  |

nonparametric variables

| Behavior                   | v  | Sig. (2-tailed) | Sig. after correction | Median |
|----------------------------|----|-----------------|-----------------------|--------|
| $\Delta$ Cumulative visits | 30 | 0.836           | 0.957                 | 0      |
| $\Delta$ Chamber visits    | 33 | 0.607           | 0.957                 | 1      |
| $\Delta$ Sniffing visits   | 27 | 0.633           | 0.957                 | 1      |

Table S8.C. Comparing behavioral preferences for high and low urinary protein concentration in Y-maze to null expectations.

| Concentration Discrimination: ( $\Delta$ =High-Low) PC ratio, parametric variables |       |    |                 |                       |                     | 95% Confidence Interval of the Difference |       |
|------------------------------------------------------------------------------------|-------|----|-----------------|-----------------------|---------------------|-------------------------------------------|-------|
| Behavior                                                                           | t     | df | Sig. (2-tailed) | Sig. after correction | Mean Difference (s) | Lower                                     | Upper |
| $\Delta$ Cumulative duration                                                       | -1.43 | 9  | 0.188           | 0.403                 | -13.44              | -34.76                                    | 7.88  |
| $\Delta$ Cumulative latency                                                        | 1.07  | 9  | 0.311           | 0.403                 | 12.65               | -14.01                                    | 39.30 |
| $\Delta$ Chamber duration                                                          | -     | -  | -               | -                     | -                   | -                                         | -     |
| $\Delta$ Chamber latency                                                           | 1.63  | 9  | 0.137           | 0.403                 | 21.22               | -8.17                                     | 50.62 |
| $\Delta$ Branch duration                                                           | -2.02 | 9  | 0.074           | 0.370                 | -3.94               | -8.35                                     | 0.47  |
| $\Delta$ Sniffing duration                                                         | -0.07 | 8  | 0.948           | 0.964                 | -0.09               | -3.05                                     | 2.88  |
| $\Delta$ Sniffing latency                                                          | 0.41  | 8  | 0.694           | 0.964                 | 8.86                | -41.26                                    | 58.99 |

nonparametric variables

| Behavior                      | v    | Sig. (2-tailed) | Sig. after correction | Median |
|-------------------------------|------|-----------------|-----------------------|--------|
| $\Delta$ Cumulative visits    | 5    | 0.042           | 0.333                 | -1.5   |
| $\Delta$ Chamber visits       | 10.5 | 0.285           | 0.948                 | -0.5   |
| $\Delta$ Sniffing visits      | 21   | 0.265           | 0.333                 | 1      |
| $\Delta$ Chamber duration (s) | 17   | 0.322           | 0.362                 | -4.04  |

Table S9. LME model for effect of female estrous phase on latency to investigate dominant urine. Delta ( $\Delta$ ) indicates the response to dominant stimuli minus subordinate observed at the given variable.

| Variable ( $\Delta$ =DOM-SUB)                    | Diestrus mean (SEM) | Estrus mean (SEM) | Sum Sq | NumDF | DenDF  | F value | Estimate | Std. Error | p value | adj. p-value |
|--------------------------------------------------|---------------------|-------------------|--------|-------|--------|---------|----------|------------|---------|--------------|
| $\Delta$ Cumulative duration (s)                 | -4.5 (13.3)         | -13.7 (17.9)      | 422.46 | 1     | 9      | 0.25    | -9.19    | 18.32      | 0.63    | 0.84         |
| $\Delta$ Cumulative latency (ln transformed [s]) | 1.28 (0.8)          | -2.72 (0.7)       | 80.12  | 1     | 4.0856 | 53.05   | -4       | 0.55       | 0.00    | 0.02         |
| $\Delta$ Chamber duration (ln transformed [s])   | -0.95 (1.1)         | -1.22 (1.14)      | 0.074  | 1     | 7.4855 | 0.01    | -0.13    | 1.28       | 0.92    | 0.92         |
| $\Delta$ Chamber latency (ln transformed [s])    | 2.42 (0.6)          | -2.38 (0.8)       | 92.5   | 1     | 1.2266 | 51.55   | -4.94    | 0.69       | 0.06    | 0.3          |
| $\Delta$ Branch duration (ln transformed [s])    | 0.33 (0.6)          | -0.03 (0.6)       | 0.66   | 1     | 9      | 0.19    | -0.36    | 0.83       | 0.67    | 0.84         |
| $\Delta$ Sniffing duration (ln transformed [s])  | -0.60 (0.4)         | -0.23 (0.4)       | 0.58   | 1     | 15     | 0.38    | 0.37     | 0.6        | 0.55    | 0.84         |
| $\Delta$ Sniffing latency (s)                    | -22.0 (13.1)        | -19.9 (12.4)      | 0.0028 | 1     | 14.024 | 0.25    | -1.57    | 3.12       | 0.62    | 0.84         |
| $\Delta$ Cumulative frequency                    | 0.1 (0.5)           | 0.4 (0.5)         | 0.45   | 1     | 9      | 0.27    | 0.3      | 0.58       | 0.62    | 0.84         |
| $\Delta$ Chamber frequency                       | -0.9 (0.6)          | 0.1 (0.3)         | 5      | 1     | 18     | 2.15    | 1        | 0.68       | 0.16    | 0.53         |
| $\Delta$ Sniffing frequency                      | -0.1 (1.1)          | -0.3 (0.62)       | 0.12   | 1     | 7.86   | 0.02    | -0.17    | 1.23       | 0.90    | 0.92         |

POST HOC TESTS on Cumulative latency (ln [s])

| Factor: Estrous phase                                                 | Comparison        | Estimate | std error | z value | p value |
|-----------------------------------------------------------------------|-------------------|----------|-----------|---------|---------|
| Estrus                                                                | SUB - DOM         | 1.03547  | 0.30046   | 3.446   | 0.00318 |
| Diestrus                                                              | SUB - DOM         | -0.56025 | 0.30046   | -1.865  | 0.24327 |
| Estrous Phase * Urine Donor Social Status [Estrus (E) - Diestrus (D)] | SUB (E) - SUB (D) | 0.97413  | 0.30046   | 3.242   | 0.00651 |
|                                                                       | DOM (E) - DOM (D) | -0.62158 | 0.30046   | -2.069  | 0.16323 |
|                                                                       | SUB (E) - DOM (D) | 0.41389  | 0.30046   | 1.378   | 0.5135  |
|                                                                       | DOM (E) - SUB (D) | -0.06133 | 0.30046   | 0.204   | 0.99699 |
|                                                                       | SUB (D) - DOM (E) |          |           |         |         |

Table S10.A. Predicting social status from relative intensity of MUPs before enclosure

| Protein | Mean (SD) of prospective dominant males | Mean (SD) of prospective subordinate males | Benjamini-Hochberg corrected p-value | Fold change |
|---------|-----------------------------------------|--------------------------------------------|--------------------------------------|-------------|
| MUP1    | 0.008 (0.004)                           | 0.013 (0.017)                              | 0.8041                               | 1.63        |
| MUP4    | 0.072 (0.035)                           | 0.112 (0.033)                              | 0.1054                               | 1.56        |
| MUP20   | 0.040 (0.015)                           | 0.041 (0.027)                              | 0.9714                               | 1.02        |
| MUP3    | 0.006 (0.005)                           | 0.006 (0.004)                              | 0.9714                               | 1.00        |
| MUP2    | 3.76E-04 (1.7E-04)                      | 3.03E-04 (1.4E-04)                         | 0.7660                               | -1.24       |
| MUP5    | 0.093 (0.021)                           | 0.066 (0.020)                              | 0.0950                               | -1.41       |
| MUP17   | 0.056 (0.014)                           | 0.038 (0.016)                              | 0.1054                               | -1.47       |

Table S10.B Comparing relative intensity of non-MUP proteins between social status groups during enclosure

| Protein                                     | Mean (SD) of dominant males | Mean (SD) of subordinate males | Benjamini-Hochberg corrected p-value | Fold change |
|---------------------------------------------|-----------------------------|--------------------------------|--------------------------------------|-------------|
| Acyl-coenzyme A synthetase                  | 0.118 (0.081)               | 0.460 (0.498)                  | 0.9567                               | 3.90        |
| Electron transfer flavoprotein subunit beta | 0.058 (0.064)               | 0.107 (0.057)                  | 0.9567                               | 1.84        |
| UPF0500 protein C1orf216 homolog            | 4.635 (1.587)               | 2.155 (1.143)                  | 0.9567                               | -2.15       |

Table S10.C. Comparing differences in MUP protein excretion between social status groups

| Name  | Mean (SD) of dominant males | Mean (SD) of subordinate males | Benjamini-Hochberg corrected p-value | Fold change |
|-------|-----------------------------|--------------------------------|--------------------------------------|-------------|
| Mup2  | 0.336 (0.160)               | 0.849 (0.465)                  | 0.0001                               | 2.53        |
| Mup1  | 1.416 (0.422)               | 1.783 (0.233)                  | 0.0073                               | 1.26        |
| Mup20 | 2.101 (0.303)               | 2.481 (0.538)                  | 0.0041                               | 1.18        |
| Mup3  | 1.187 (0.460)               | 1.401 (0.504)                  | 0.2181                               | 1.18        |
| Mup17 | 2.228 (0.222)               | 2.564 (0.402)                  | 0.0004                               | 1.15        |
| Mup5  | 2.481 (0.202)               | 2.769 (0.161)                  | 0.0003                               | 1.12        |
| Mup4  | 2.443 (0.302)               | 2.718 (0.588)                  | 0.0070                               | 1.11        |

Table S10.D. Comparing differences in non-MUP protein relative intensity between social status groups

| Name               | Mean (SD) of dominant males | Mean (SD) of subordinate males | Benjamini-Hochberg corrected p-value | fold change |
|--------------------|-----------------------------|--------------------------------|--------------------------------------|-------------|
| P23953_EST1C_MOUSE | 0.178 (0.073)               | 0.471 (0.301)                  | <0.001                               | 2.64        |
| P51437_CRAMP_MOUSE | 0.040 (0.032)               | 0.145 (0.084)                  | <0.001                               | 3.64        |
| Q9CZ13_QCR1_MOUSE  | 0.013 (0.004)               | 0.081 (0.194)                  | <0.001                               | 6.13        |
| P21614_VTDB_MOUSE  | 0.119 (0.096)               | 0.360 (0.293)                  | <0.001                               | 3.03        |
| Q8BP99_CA216_MOUSE | 1.221 (0.551)               | 3.906 (1.854)                  | <0.001                               | 3.20        |
| Q00898_A1AT5_MOUSE | 0.769 (1.694)               | 4.047 (2.930)                  | <0.001                               | 5.27        |
| Q60590_A1AG1_MOUSE | 0.192 (0.128)               | 0.557 (0.292)                  | 0.001                                | 2.90        |
| P04104_K2C1_MOUSE  | 0.007 (0.003)               | 0.027 (0.015)                  | 0.001                                | 4.02        |
| P20918_PLMN_MOUSE  | 0.150 (0.114)               | 0.518 (0.365)                  | 0.0056                               | 3.44        |
| P56391_CX6B1_MOUSE | 0.033 (0.023)               | 0.222 (0.308)                  | 0.0062                               | 6.77        |
| P28665_MUG1_MOUSE  | 0.224 (0.241)               | 0.615 (0.596)                  | 0.0068                               | 2.74        |
| P12246_SAMP_MOUSE  | 0.047 (0.045)               | 0.107 (0.061)                  | 0.0096                               | 2.29        |
| P0CW02_LY6C1_MOUSE | 0.138 (0.096)               | 0.173 (0.176)                  | 0.0104                               | 1.25        |
| Q9DB77_QCR2_MOUSE  | 0.017 (0.014)               | 0.082 (0.062)                  | 0.0118                               | 4.75        |
| A6X935_ITIH4_MOUSE | 0.087 (0.192)               | 0.137 (0.131)                  | 0.0174                               | 1.58        |
| P11087_CO1A1_MOUSE | 0.103 (0.121)               | 0.291 (0.282)                  | 0.0185                               | 2.83        |
| Q8K0L3_ACSM2_MOUSE | 0.071 (0.024)               | 0.219 (0.319)                  | 0.0196                               | 3.08        |
| Q61147_CERU_MOUSE  | 0.070 (0.109)               | 0.180 (0.380)                  | 0.0233                               | 2.58        |
| Q05920_PYC_MOUSE   | 0.072 (0.045)               | 0.192 (0.300)                  | 0.0233                               | 2.67        |
| Q9QXC1_FETUB_MOUSE | 0.183 (0.144)               | 0.350 (0.191)                  | 0.0233                               | 1.92        |
| P09803_CADH1_MOUSE | 0.146 (0.089)               | 0.295 (0.141)                  | 0.0233                               | 2.02        |
| P63260_ACTG_MOUSE  | 0.139 (0.092)               | 0.298 (0.199)                  | 0.0235                               | 2.15        |
| Q6IFZ6_K2C1B_MOUSE | 1.240 (0.787)               | 2.845 (2.648)                  | 0.0269                               | 2.29        |
| P01942_HBA_MOUSE   | 0.240 (0.237)               | 0.805 (1.052)                  | 0.029                                | 3.36        |

|                   |               |               |        |      |
|-------------------|---------------|---------------|--------|------|
| O08677_KNG1_MOUSE | 1.035 (0.948) | 2.256 (1.636) | 0.0313 | 2.18 |
| P04186_CFAB_MOUSE | 0.152 (0.181) | 0.263 (0.194) | 0.0468 | 1.74 |

Table S10.E. Comparing differences in non-MUP protein excretion between social status groups

| Name               | Mean (SD) of dominant males | Mean (SD) of subordinate males | Benjamini-Hochberg corrected p-value | fold change |
|--------------------|-----------------------------|--------------------------------|--------------------------------------|-------------|
| A6X935_ITIH4_MOUSE | 0.089 (0.155)               | 0.310 (0.190)                  | <0.001                               | 3.47        |
| O08677_KNG1_MOUSE  | 0.589 (0.240)               | 1.197 (0.446)                  | <0.001                               | 2.03        |
| O70570_PIGR_MOUSE  | 0.076 (0.091)               | 0.187 (0.105)                  | <0.001                               | 2.45        |
| P00688_AMYP_MOUSE  | 0.334 (0.224)               | 0.821 (0.340)                  | <0.001                               | 2.45        |
| P01027_CO3_MOUSE   | 0.279 (0.164)               | 0.704 (0.272)                  | <0.001                               | 2.53        |
| P01837_IGKC_MOUSE  | 0.201 (0.111)               | 0.568 (0.257)                  | <0.001                               | 2.83        |
| P01942_HBA_MOUSE   | 0.237 (0.230)               | 0.749 (0.368)                  | <0.001                               | 3.16        |
| P02088_HBB1_MOUSE  | 0.224 (0.131)               | 0.505 (0.241)                  | <0.001                               | 2.26        |
| P02089_HBB2_MOUSE  | 0.130 (0.070)               | 0.376 (0.250)                  | <0.001                               | 2.90        |
| P02535_K1C10_MOUSE | 0.830 (0.272)               | 1.193 (0.202)                  | <0.001                               | 1.44        |
| P02816_PIP_MOUSE   | 0.218 (0.159)               | 0.539 (0.307)                  | <0.001                               | 2.47        |
| P03953_CFAD_MOUSE  | 1.525 (0.325)               | 1.895 (0.205)                  | <0.001                               | 1.24        |
| P04104_K2C1_MOUSE  | 0.011 (0.009)               | 0.089 (0.053)                  | <0.001                               | 8.36        |
| P04186_CFAB_MOUSE  | 0.177 (0.198)               | 0.481 (0.224)                  | <0.001                               | 2.72        |
| P05533_LY6A_MOUSE  | 0.338 (0.138)               | 0.693 (0.225)                  | <0.001                               | 2.05        |
| P07724_ALBU_MOUSE  | 1.101 (0.197)               | 1.570 (0.480)                  | <0.001                               | 1.43        |
| P07759_SPA3K_MOUSE | 0.249 (0.224)               | 0.631 (0.392)                  | <0.001                               | 2.53        |
| P09803_CADH1_MOUSE | 0.165 (0.166)               | 0.471 (0.221)                  | <0.001                               | 2.86        |
| P0CW02_LY6C1_MOUSE | 0.183 (0.133)               | 0.536 (0.182)                  | <0.001                               | 2.92        |
| P11087_CO1A1_MOUSE | 0.135 (0.150)               | 0.469 (0.270)                  | <0.001                               | 3.47        |
| P12246_SAMP_MOUSE  | 0.069 (0.073)               | 0.286 (0.140)                  | <0.001                               | 4.11        |
| P19001_K1C19_MOUSE | 0.186 (0.128)               | 0.463 (0.238)                  | <0.001                               | 2.49        |
| P20918_PLMN_MOUSE  | 0.179 (0.124)               | 0.690 (0.288)                  | <0.001                               | 3.85        |
| P21614_VTDB_MOUSE  | 0.153 (0.122)               | 0.576 (0.246)                  | <0.001                               | 3.77        |
| P23953_EST1C_MOUSE | 0.214 (0.110)               | 0.674 (0.227)                  | <0.001                               | 3.15        |
| P28665_MUG1_MOUSE  | 0.226 (0.173)               | 0.714 (0.294)                  | <0.001                               | 3.16        |
| P29788_VTNC_MOUSE  | 0.125 (0.136)               | 0.459 (0.321)                  | <0.001                               | 3.68        |
| P35459_LY6D_MOUSE  | 0.666 (0.249)               | 1.044 (0.243)                  | <0.001                               | 1.57        |
| P45952_ACADM_MOUSE | 0.234 (0.155)               | 0.562 (0.261)                  | <0.001                               | 2.41        |
| P50446_K2C6A_MOUSE | 0.176 (0.062)               | 0.453 (0.455)                  | <0.001                               | 2.58        |
| P51437_CRAMP_MOUSE | 0.062 (0.056)               | 0.339 (0.172)                  | <0.001                               | 5.47        |
| P54071_IDHP_MOUSE  | 0.044 (0.052)               | 0.124 (0.068)                  | <0.001                               | 2.79        |
| P56391_CX6B1_MOUSE | 0.053 (0.059)               | 0.390 (0.271)                  | <0.001                               | 7.32        |
| P56480_ATPB_MOUSE  | 0.299 (0.111)               | 0.743 (0.308)                  | <0.001                               | 2.48        |
| P63260_ACTG_MOUSE  | 0.173 (0.119)               | 0.523 (0.225)                  | <0.001                               | 3.02        |
| P70269_CATE_MOUSE  | 0.569 (0.281)               | 1.040 (0.319)                  | <0.001                               | 1.83        |
| Q00623_APOA1_MOUSE | 0.052 (0.047)               | 0.215 (0.193)                  | <0.001                               | 4.11        |
| Q00898_A1AT5_MOUSE | 0.392 (0.351)               | 1.457 (0.275)                  | <0.001                               | 3.72        |
| Q02257_PLAK_MOUSE  | 0.119 (0.093)               | 0.408 (0.252)                  | <0.001                               | 3.41        |
| Q05793_PGMB_MOUSE  | 0.026 (0.020)               | 0.095 (0.111)                  | <0.001                               | 3.67        |
| Q05920_PYC_MOUSE   | 0.092 (0.116)               | 0.302 (0.266)                  | <0.001                               | 3.28        |
| Q07456_AMBP_MOUSE  | 0.687 (0.316)               | 1.212 (0.261)                  | <0.001                               | 1.76        |
| Q3TTY5_K22E_MOUSE  | 0.534 (0.132)               | 0.782 (0.150)                  | <0.001                               | 1.46        |
| Q49714_KRT35_MOUSE | 0.171 (0.125)               | 0.527 (0.268)                  | <0.001                               | 3.08        |
| Q60590_A1AG1_MOUSE | 0.217 (0.140)               | 0.725 (0.246)                  | <0.001                               | 3.34        |
| Q60928_GGT1_MOUSE  | 0.131 (0.103)               | 0.398 (0.203)                  | <0.001                               | 3.05        |
| Q60932_VDAC1_MOUSE | 0.353 (0.195)               | 0.705 (0.304)                  | <0.001                               | 2.00        |
| Q61147_CERU_MOUSE  | 0.212 (0.177)               | 0.587 (0.212)                  | <0.001                               | 2.77        |
| Q61207_SAP_MOUSE   | 1.041 (0.176)               | 1.368 (0.233)                  | <0.001                               | 1.31        |
| Q61414_K1C15_MOUSE | 0.339 (0.160)               | 0.696 (0.129)                  | <0.001                               | 2.05        |
| Q61646_HPT_MOUSE   | 0.746 (0.270)               | 1.270 (0.409)                  | <0.001                               | 1.70        |
| Q61838_A2M_MOUSE   | 0.374 (0.184)               | 0.827 (0.342)                  | <0.001                               | 2.21        |
| Q61FZ6_K2C1B_MOUSE | 0.665 (0.187)               | 1.291 (0.263)                  | <0.001                               | 1.94        |



|                    |               |               |        |      |
|--------------------|---------------|---------------|--------|------|
| Q6NXH9_K2C73_MOUSE | 0.725 (0.221) | 1.208 (0.204) | <0.001 | 1.67 |
| Q8BHCO_LYVE1_MOUSE | 0.447 (0.200) | 0.875 (0.200) | <0.001 | 1.96 |
| Q8BP99_CA216_MOUSE | 0.681 (0.209) | 1.490 (0.320) | <0.001 | 2.19 |
| Q8C6C9_CF058_MOUSE | 0.624 (0.210) | 1.081 (0.318) | <0.001 | 1.73 |
| Q8K0L3_ACSM2_MOUSE | 0.101 (0.057) | 0.378 (0.272) | <0.001 | 3.75 |
| Q921I1_TRFE_MOUSE  | 0.521 (0.142) | 0.919 (0.430) | <0.001 | 1.77 |
| Q922U2_K2C5_MOUSE  | 0.215 (0.164) | 0.438 (0.226) | <0.001 | 2.04 |
| Q9CZ13_QCR1_MOUSE  | 0.021 (0.010) | 0.160 (0.218) | <0.001 | 7.77 |
| Q9DAU7_WFDC2_MOUSE | 0.185 (0.086) | 0.417 (0.251) | <0.001 | 2.25 |
| Q9DB77_QCR2_MOUSE  | 0.031 (0.042) | 0.223 (0.147) | <0.001 | 7.24 |
| Q9DBD0_ICA_MOUSE   | 0.125 (0.074) | 0.288 (0.110) | <0.001 | 2.30 |
| Q9EQ20_MMSA_MOUSE  | 0.335 (0.147) | 0.682 (0.221) | <0.001 | 2.03 |
| Q9QWL7_K1C17_MOUSE | 0.248 (0.113) | 0.633 (0.326) | <0.001 | 2.55 |
| Q9QXC1_FETUB_MOUSE | 0.096 (0.063) | 0.344 (0.246) | <0.001 | 3.57 |
| Q9Z2K1_K1C16_MOUSE | 0.205 (0.054) | 0.551 (0.297) | <0.001 | 2.69 |
| O08997_ATOX1_MOUSE | 0.075 (0.070) | 0.193 (0.112) | 0.0011 | 2.57 |
| O89020_AFAM_MOUSE  | 0.050 (0.063) | 0.205 (0.154) | 0.0011 | 4.10 |
| Q99KI0_ACON_MOUSE  | 0.265 (0.248) | 0.567 (0.243) | 0.0011 | 2.14 |
| P28798_GRN_MOUSE   | 0.338 (0.176) | 0.557 (0.179) | 0.0013 | 1.65 |
| Q9DBM2_ECHP_MOUSE  | 0.038 (0.041) | 0.105 (0.087) | 0.0013 | 2.75 |
| P61110_ANRE_MOUSE  | 0.660 (0.386) | 1.171 (0.420) | 0.0017 | 1.78 |
| P01869_IGH1M_MOUSE | 0.333 (0.269) | 0.770 (0.428) | 0.0018 | 2.31 |
| P22599_A1AT2_MOUSE | 0.087 (0.037) | 0.242 (0.188) | 0.0023 | 2.76 |
| P15947_KLK1_MOUSE  | 1.043 (0.358) | 1.442 (0.300) | 0.0026 | 1.38 |
| Q8VDN2_AT1A1_MOUSE | 0.274 (0.151) | 0.515 (0.240) | 0.0026 | 1.88 |
| P51910_APOD_MOUSE  | 0.273 (0.162) | 0.526 (0.256) | 0.0031 | 1.93 |
| P07758_A1AT1_MOUSE | 0.395 (0.302) | 0.981 (0.508) | 0.0033 | 2.48 |
| Q3UV17_K22O_MOUSE  | 0.070 (0.039) | 0.187 (0.219) | 0.0035 | 2.68 |
| P01843_LAC1_MOUSE  | 0.207 (0.176) | 0.490 (0.302) | 0.0045 | 2.36 |
| P01867_IGG2B_MOUSE | 0.113 (0.074) | 0.253 (0.215) | 0.0045 | 2.23 |
| P08228_SODC_MOUSE  | 0.335 (0.352) | 0.678 (0.281) | 0.0045 | 2.03 |
| Q91X17_UROM_MOUSE  | 1.193 (0.226) | 1.449 (0.230) | 0.0045 | 1.21 |
| Q8BZH1_TGM4_MOUSE  | 0.143 (0.135) | 0.379 (0.238) | 0.0046 | 2.65 |
| Q9Z0K8_VNN1_MOUSE  | 0.079 (0.095) | 0.233 (0.197) | 0.0053 | 2.94 |
| Q03265_ATPA_MOUSE  | 0.160 (0.126) | 0.410 (0.322) | 0.0062 | 2.57 |
| Q6IFX2_K1C42_MOUSE | 0.508 (0.322) | 0.911 (0.412) | 0.0062 | 1.79 |
| Q00897_A1AT4_MOUSE | 0.215 (0.150) | 0.416 (0.221) | 0.0067 | 1.93 |
| P10923_OSTP_MOUSE  | 0.153 (0.087) | 0.327 (0.219) | 0.0068 | 2.14 |
| Q62395_TFF3_MOUSE  | 0.322 (0.219) | 0.643 (0.368) | 0.0074 | 1.99 |
| A2ARV4_LRP2_MOUSE  | 0.245 (0.199) | 0.512 (0.333) | 0.0075 | 2.09 |
| O09114_PTGDS_MOUSE | 0.285 (0.127) | 0.547 (0.389) | 0.0081 | 1.92 |
| P01865_GCAM_MOUSE  | 0.042 (0.052) | 0.109 (0.089) | 0.0081 | 2.59 |
| P63038_CH60_MOUSE  | 0.203 (0.185) | 0.377 (0.203) | 0.0081 | 1.85 |
| Q06890_CLUS_MOUSE  | 0.433 (0.317) | 0.723 (0.244) | 0.0081 | 1.67 |
| P48962_ADT1_MOUSE  | 0.142 (0.190) | 0.305 (0.228) | 0.0089 | 2.15 |
| P29699_FETUA_MOUSE | 0.460 (0.402) | 0.705 (0.337) | 0.0099 | 1.53 |
| Q6NZJ6_IF4G1_MOUSE | 0.506 (0.709) | 1.034 (1.052) | 0.0122 | 2.04 |
| P28825_MEP1A_MOUSE | 0.818 (0.362) | 1.167 (0.371) | 0.0125 | 1.43 |
| Q03401_CRIS1_MOUSE | 0.103 (0.103) | 0.178 (0.103) | 0.02   | 1.72 |
| Q9DCW4_ETFB_MOUSE  | 0.092 (0.077) | 0.199 (0.154) | 0.0214 | 2.18 |
| P09036_ISK3_MOUSE  | 0.217 (0.229) | 0.287 (0.132) | 0.0317 | 1.32 |
| Q91X72_HEMO_MOUSE  | 0.401 (0.234) | 0.615 (0.302) | 0.0358 | 1.53 |
| P49183_DNAS1_MOUSE | 1.206 (0.249) | 1.415 (0.299) | 0.0433 | 1.17 |

Table S11.A. Comparing total protein fold change in dominant male urinary excretion during group housing to null expectations.

| protein amount | t    | df | Sig. (2-tailed) | Sig. after correction | Mean Difference | 95% Confidence Interval of the Difference |       |
|----------------|------|----|-----------------|-----------------------|-----------------|-------------------------------------------|-------|
|                |      |    |                 |                       |                 | Lower                                     | Upper |
| <b>Mup20</b>   | 5.62 | 11 | 0.000           | 0.003                 | 0.567           | 0.345                                     | 0.788 |
| <b>Mup17</b>   | 3.85 | 11 | 0.003           | 0.007                 | 1.522           | 0.651                                     | 2.393 |
| Mup3           | 1.51 | 11 | 0.158           | 0.184                 | 0.291           | -0.132                                    | 0.715 |
| Mup1           | 2.33 | 11 | 0.040           | 0.056                 | 0.389           | 0.022                                     | 0.756 |
| <b>Mup5</b>    | 2.85 | 11 | 0.016           | 0.028                 | 0.218           | 0.049                                     | 0.386 |
| <b>Mup2</b>    | 4.32 | 11 | 0.001           | 0.004                 | 0.779           | 0.382                                     | 1.176 |
| Mup4           | 1.37 | 11 | 0.197           | 0.197                 | 0.299           | -0.180                                    | 0.777 |

Table S11.B. Comparing total protein fold change in subordinate male urinary excretion during group housing to null expectations.

| protein amount | t    | df | Sig. (2-tailed) | Sig. after correction | Mean Difference | 95% Confidence Interval of the Difference |       |
|----------------|------|----|-----------------|-----------------------|-----------------|-------------------------------------------|-------|
|                |      |    |                 |                       |                 | Lower                                     | Upper |
| Mup20          | 1.25 | 4  | 0.281           | 0.281                 | 1.193           | -1.464                                    | 3.849 |
| Mup17          | 2.45 | 4  | 0.071           | 0.166                 | 3.327           | -0.449                                    | 7.104 |
| Mup3           | 1.83 | 4  | 0.141           | 0.197                 | 1.822           | -0.942                                    | 4.586 |
| Mup1           | 1.86 | 4  | 0.136           | 0.197                 | 3.735           | -1.830                                    | 9.299 |
| Mup5           | 3.58 | 4  | 0.023           | 0.161                 | 2.134           | 0.478                                     | 3.790 |
| Mup2           | 2.47 | 4  | 0.069           | 0.166                 | 4.280           | -0.535                                    | 9.095 |
| Mup4           | 1.33 | 4  | 0.256           | 0.281                 | 2.736           | -2.995                                    | 8.468 |

Table S11.C. Comparing relative intensity fold change in dominant male urinary protein excretion during group housing to null expectations.

| relative intensity | t     | df | Sig. (2-tailed) | Sig. after correction | Mean Difference | 95% Confidence Interval of the Difference |        |
|--------------------|-------|----|-----------------|-----------------------|-----------------|-------------------------------------------|--------|
|                    |       |    |                 |                       |                 | Lower                                     | Upper  |
| Mup20              | 2.35  | 11 | 0.038           | 0.089                 | 0.599           | 0.039                                     | 1.158  |
| Mup17              | -0.36 | 11 | 0.726           | 0.821                 | -0.047          | -0.337                                    | 0.242  |
| Mup3               | -0.75 | 11 | 0.471           | 0.660                 | -0.127          | -0.503                                    | 0.248  |
| Mup1               | -0.23 | 11 | 0.821           | 0.821                 | -0.030          | -0.313                                    | 0.253  |
| <b>Mup5</b>        | -6.17 | 11 | 0.000           | 0.003                 | -0.348          | -0.472                                    | -0.224 |
| Mup2               | 2.39  | 11 | 0.036           | 0.089                 | 0.360           | 0.029                                     | 0.692  |
| Mup4               | 1.25  | 11 | 0.237           | 0.415                 | 0.515           | -0.392                                    | 1.423  |

Table S11.D. Comparing relative intensity fold change in subordinate male urinary protein excretion during group housing to null expectations.

| relative intensity | t     | df | Sig. (2-tailed) | Sig. after correction | Mean Difference | 95% Confidence Interval of the Difference |       |
|--------------------|-------|----|-----------------|-----------------------|-----------------|-------------------------------------------|-------|
|                    |       |    |                 |                       |                 | Lower                                     | Upper |
| Mup20              | -1.50 | 4  | 0.208           | 0.525                 | -0.372          | -1.061                                    | 0.317 |
| Mup17              | 1.00  | 4  | 0.375           | 0.525                 | 0.363           | -0.648                                    | 1.375 |
| Mup3               | -0.79 | 4  | 0.471           | 0.550                 | -0.197          | -0.887                                    | 0.492 |
| Mup1               | 1.16  | 4  | 0.309           | 0.525                 | 0.539           | -0.747                                    | 1.826 |
| Mup5               | 1.04  | 4  | 0.358           | 0.525                 | 0.389           | -0.651                                    | 1.429 |
| Mup2               | 1.85  | 4  | 0.138           | 0.525                 | 0.634           | -0.317                                    | 1.584 |
| Mup4               | 0.14  | 4  | 0.898           | 0.900                 | 0.072           | -1.389                                    | 1.532 |

**Regulation of volatile and non-volatile pheromone attractants depends upon male social status**

**Supplementary Figures S1 Fig. 1 to S1 Fig. 12**

## Regulation of volatile and non-volatile pheromone attractants depends upon male social status

### S1. Supplemental Figures

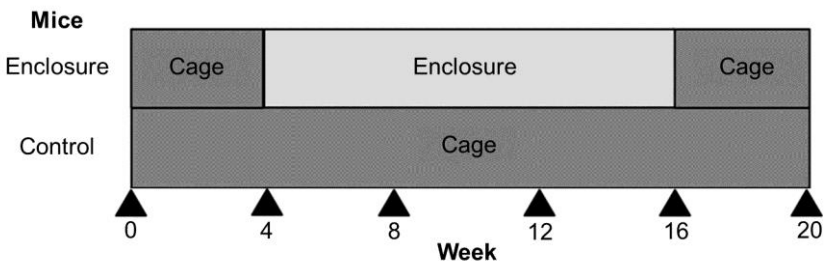

**S1 Fig 1. Urine collection regime.**

Urine collections (indicated by black triangle) were collected in 4 week intervals. Mice were housed singly in cages except for mice housed in seminatural enclosures during the 12 week enclosure phase.

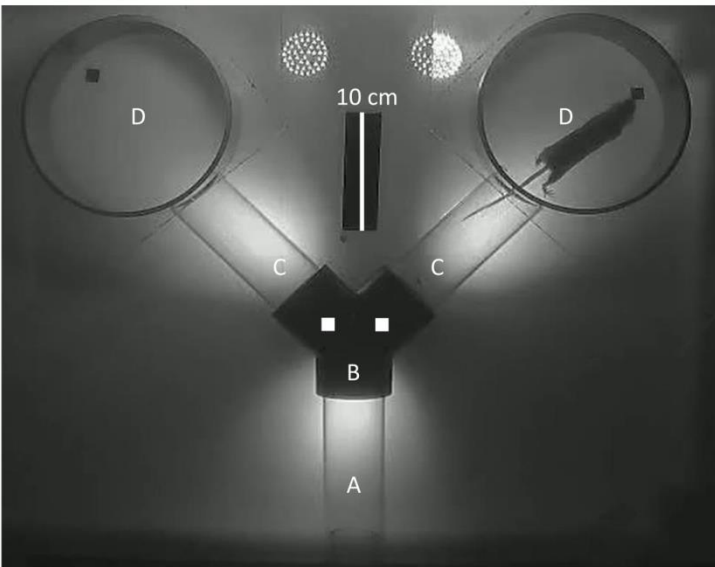

**S1 Fig 2. Y-maze apparatus with test mouse for olfactory discrimination.**

A) Primary branch (20 cm), B) Decision zone, C) Secondary branches (15 cm), D) Chambers (16 cm  $\varnothing$  and 8 cm height) secured by plexiglass planes. Competing test stimuli were placed on the black and white squares. Backlighting and overhead lighting (note reflection at top of image) provided by 48-LED infrared lights.

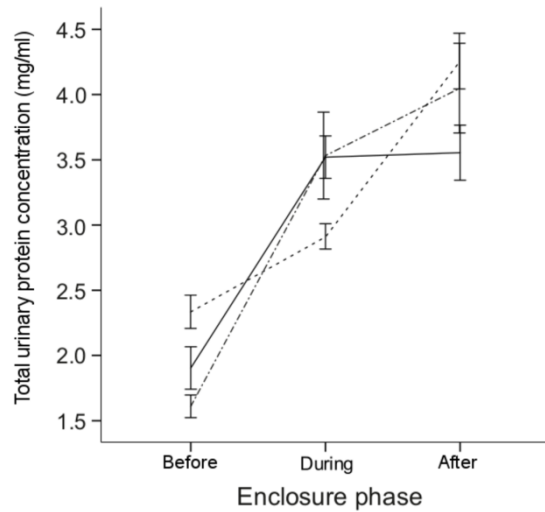

**S1 Fig 3. Male total urinary protein excretion increases over time.**

Total urinary protein excretion before, during, and after housing in seminatural enclosures for socially dominant (solid line) and subordinate (dot-dashed line) males compared to caged control males (dashed line). Error bars indicate mean  $\pm$  1 s.e.m.

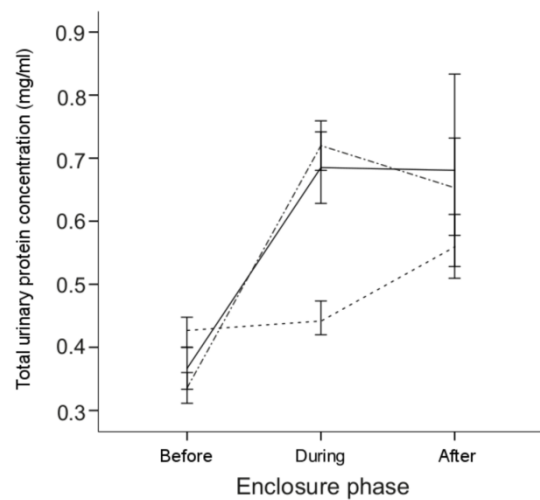

**S1 Fig 4. Enclosure females upregulate total urinary protein excretion during seminatural conditions.**

Total urinary protein excretion before, during, and after housing in semi-natural enclosures for socially dominant (solid line) and subordinate (dot-dashed line) females compared to caged control females (dashed line). Error bars indicate mean  $\pm$  1 s.e.m.

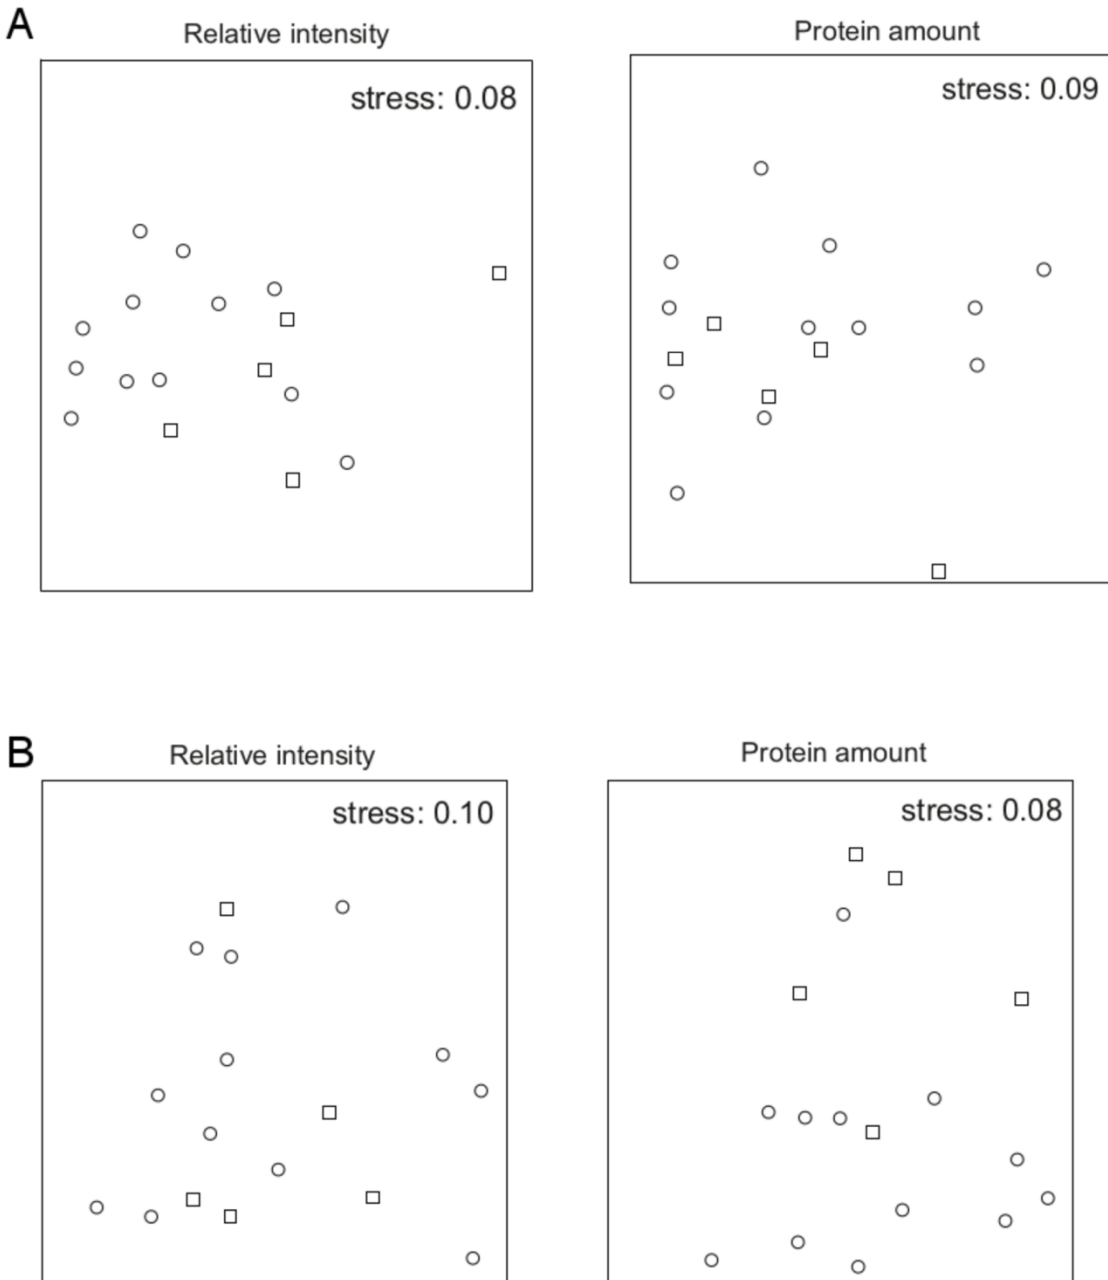

**S1 Fig 5. Urinary protein profile similarity between males before release into seminatural conditions.**

Protein profile similarity of males that later became dominant (circles) and subordinate (squares) before the enclosure phase visualized using nonmetric multidimensional scaling. Data points closer together represent individuals with relatively high chemical similarity in relative intensity (left side) or protein amount (right side) of (A) MUPs and (B) non-MUP urinary proteins.

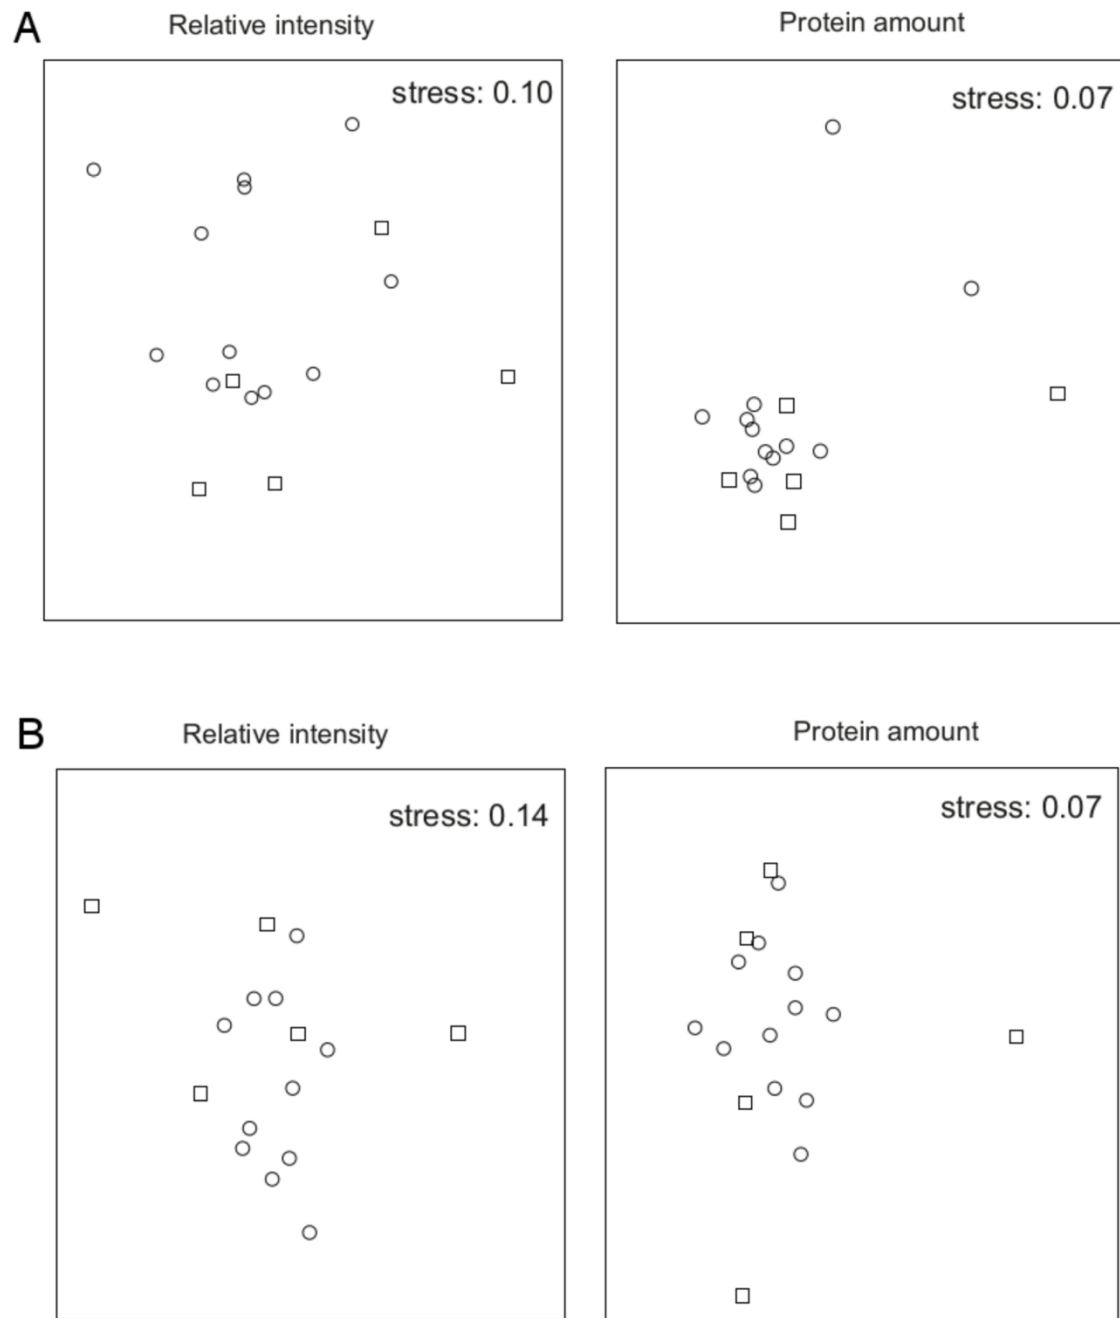

**S1 Fig 6. Urinary protein profile similarity between males during seminatural conditions.**

Protein profile similarity of dominant (circles) and subordinate (squares) males during the enclosure phase visualized using nonmetric multidimensional scaling. Data points closer together represent individuals with relatively high chemical similarity in relative intensity (left side) or protein amount (right side) of (A) MUPs and (B) non-MUP urinary proteins.

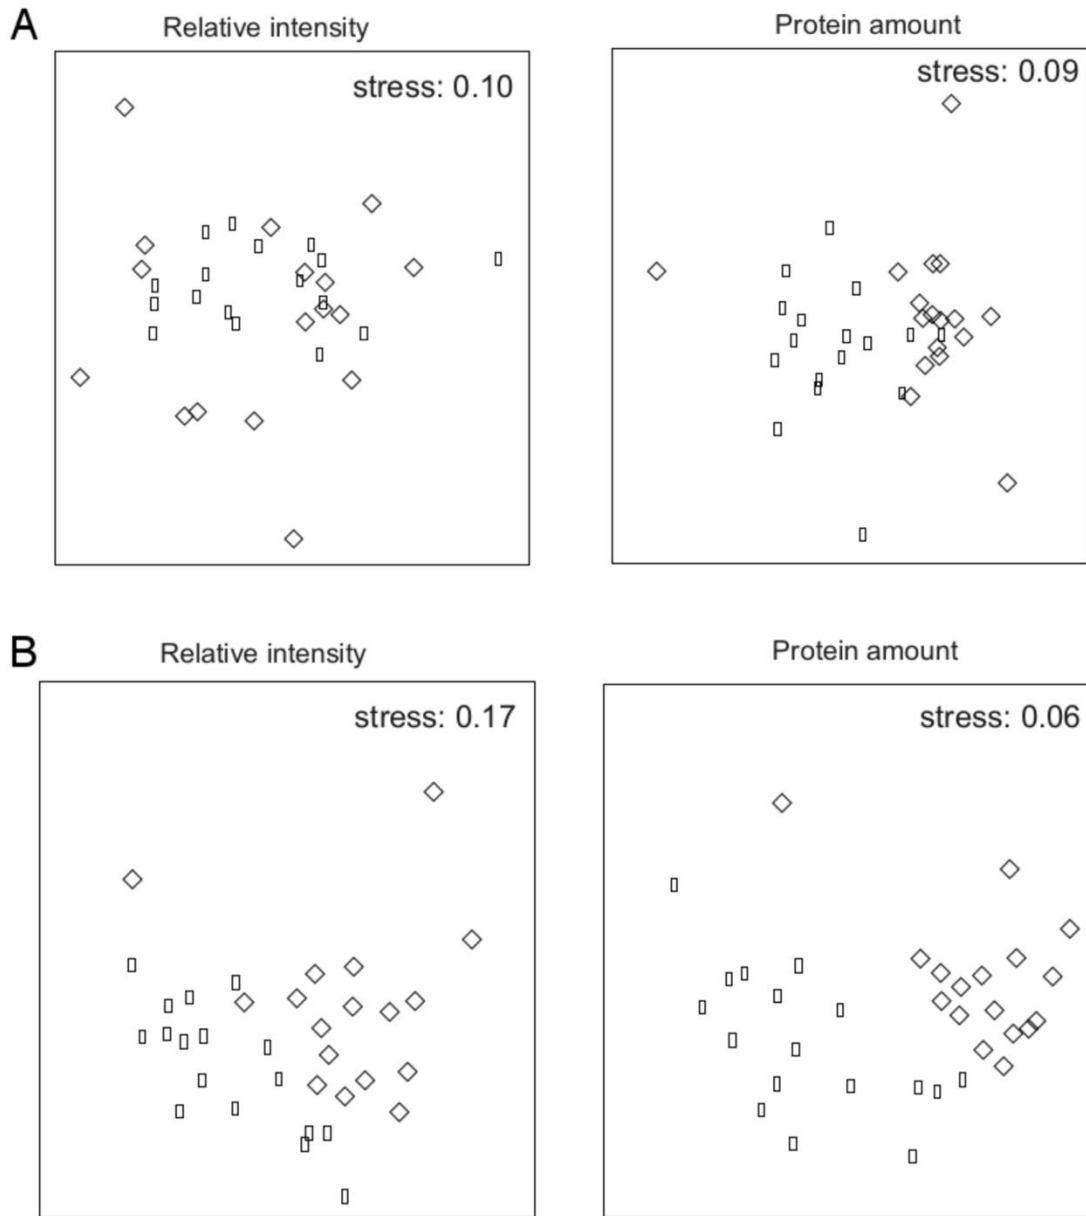

**S1 Fig 7. Effects of seminatural conditions on urinary protein profile similarity within males.**

Protein profile similarity of males before (rectangle) and during (rhombus) the enclosure phase visualized using nonmetric multidimensional scaling. Data points closer together represent individuals with relatively high chemical similarity in relative intensity (left side) or protein amount (right side) of (A) MUPs and (B) non-MUP urinary proteins.



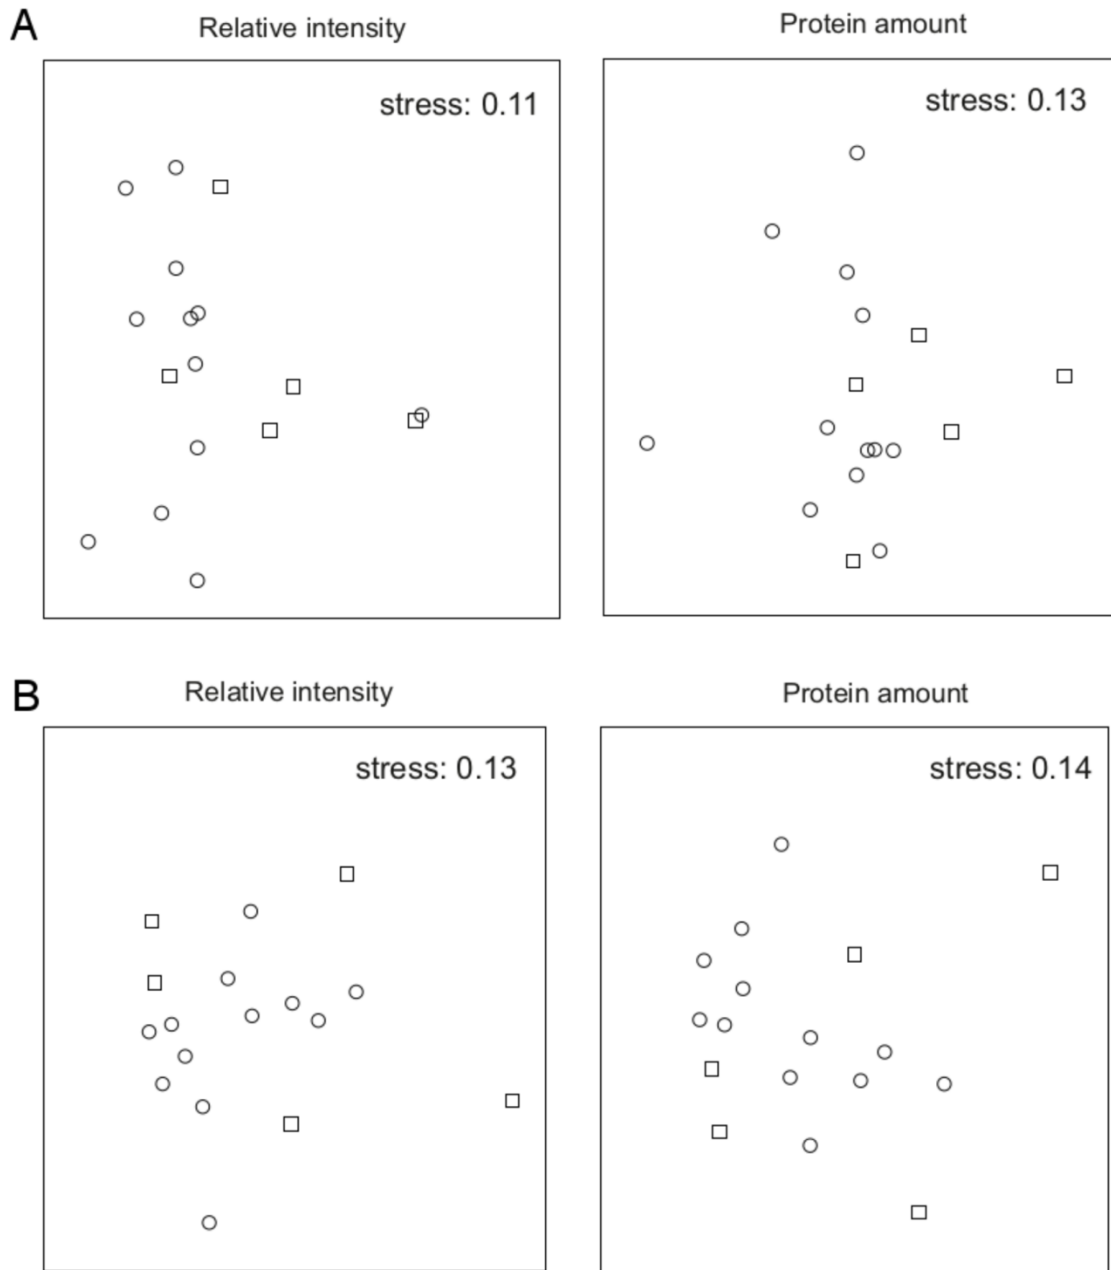

**S1 Fig 8. Effects of seminatural conditions on the similarity of urinary protein profile fold-changes within males.**

Protein profile similarity of dominant (circles) and subordinate (squares) males during the enclosure phase visualized using nonmetric multidimensional scaling. Data points closer together represent individuals with relatively high chemical similarity in fold change of relative intensity (left side) or fold change of protein amount (right side) of (A) MUPs and (B) non-MUP urinary proteins.

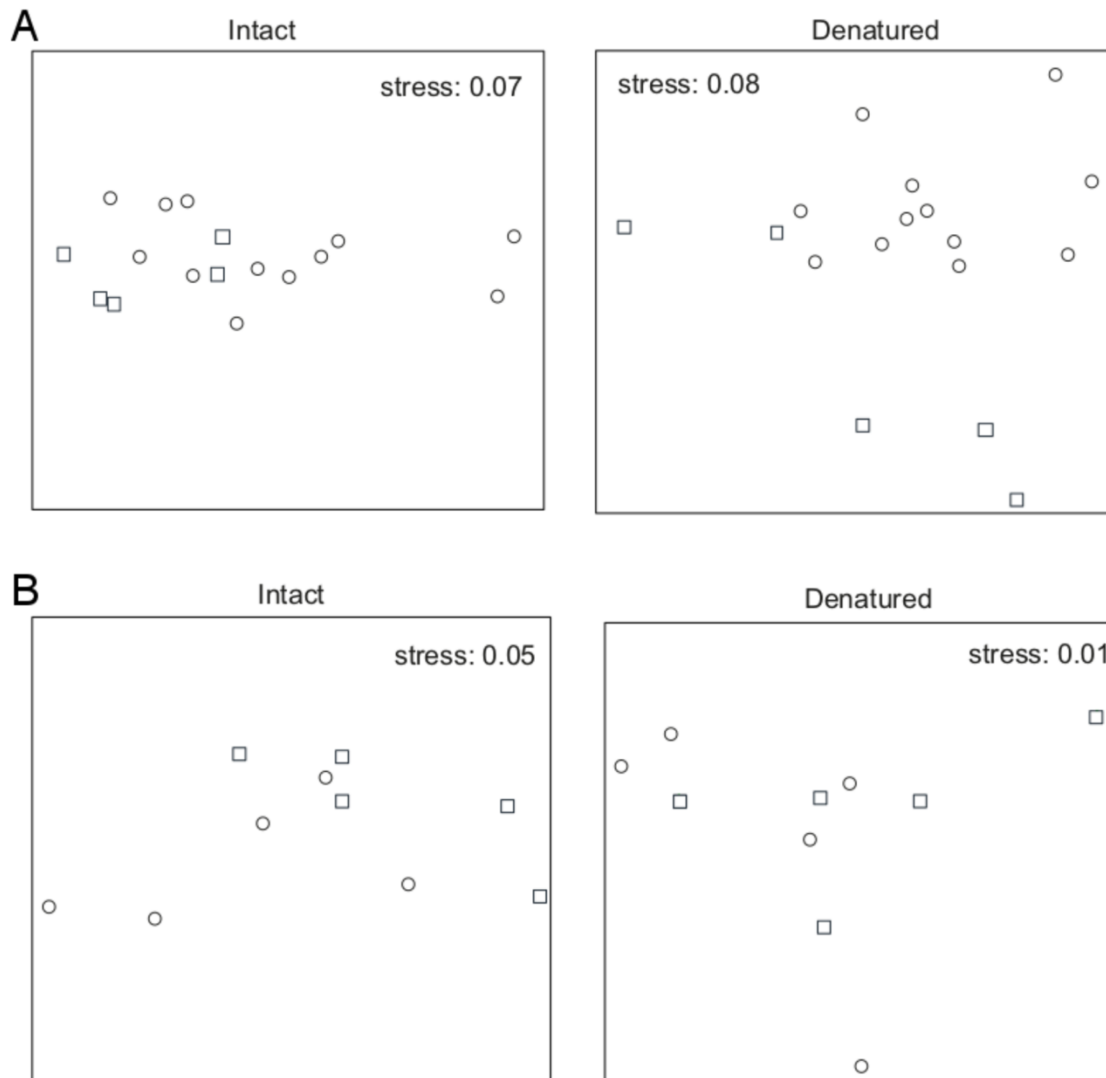

**S1 Fig 9. Targeted volatile profile similarity between social status groups during seminatural conditions.**

Volatile organic compound profile similarity based on 34 urinary compounds (targeted approach) of (A) dominant (circles) and subordinate (squares) males and (B) dominant (circles) and subordinate (squares) females during the enclosure phase visualized using nonmetric multidimensional scaling. Data points closer together represent individuals with relatively high chemical similarity in intact (left side) or denatured (right side) urine.

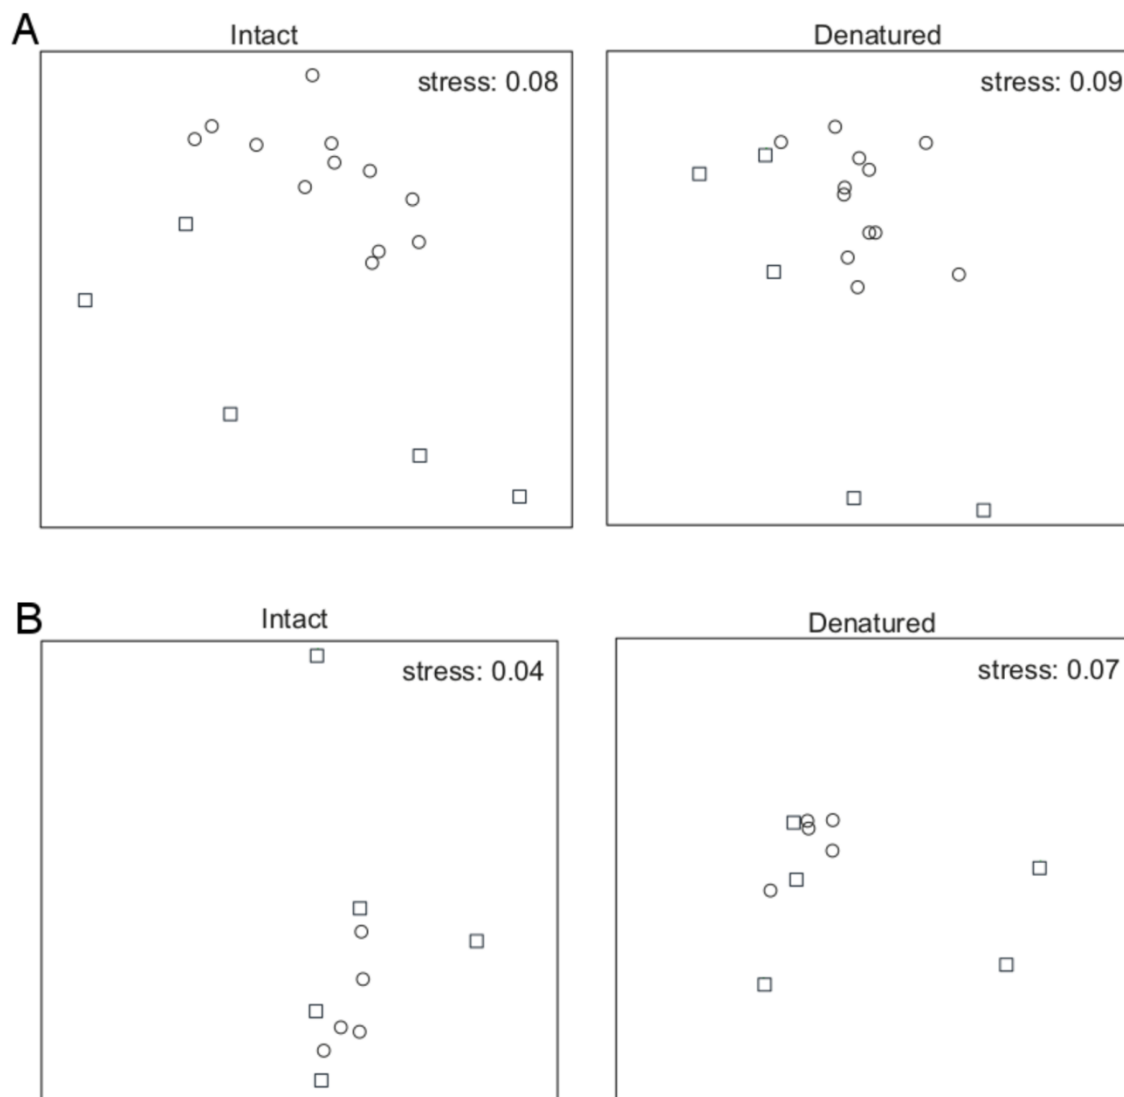

**S1 Fig 10. Exploratory volatile profile similarity between social status groups during seminatural conditions.**

Volatile organic compound profile similarity based on 962 GCMS peaks (exploratory data analysis) of (A) dominant (circles) and subordinate (squares) males and (B) dominant (circles) and subordinate (squares) females during the enclosure phase visualized using nonmetric multidimensional scaling. Data points closer together represent individuals with relatively high chemical similarity in intact (left side) or denatured (right side) urine.

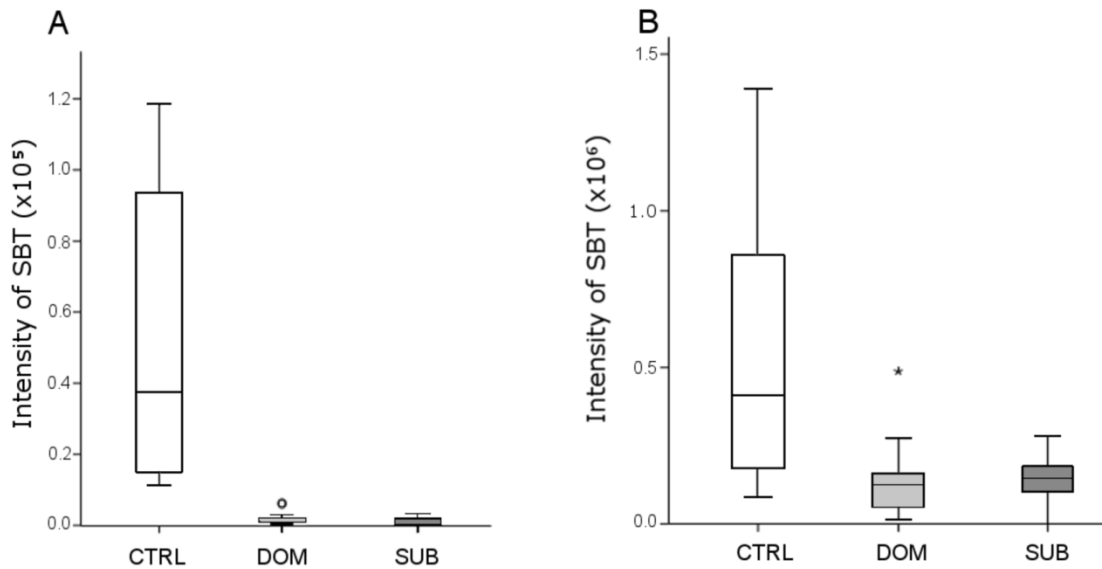

**S1 Fig 11. SBT expression upregulated in caged control male urine.**

Intensity of 2-sec-Butyl-4,5-dihydrothiazole (SBT) measured by gas chromatography-mass spectrometry in (A) intact and (B) denatured male urine samples of caged controls (white box), dominants (light gray box) and subordinates (dark gray box). Note the different y-axes scale between panels.

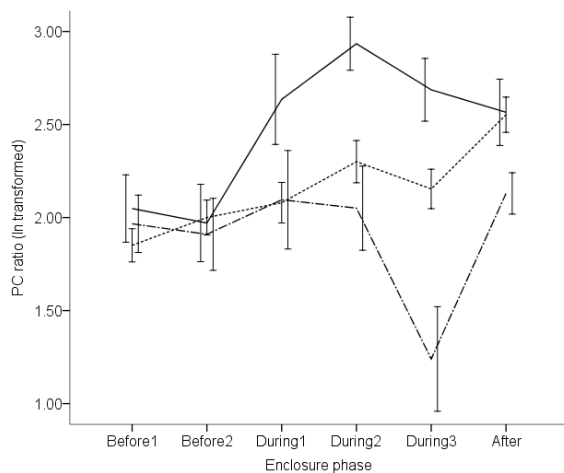

**S1 Fig 12. Male urinary protein excretion (PC ratio) at each collection period.**

Urinary protein excretion before, during, and after housing in seminatural enclosures for socially dominant (solid line) and subordinate (dot-dashed line) males compared to caged control males (dashed line). Mice were repeatedly sampled before (two collections) and during (three urine collections) the enclosure phases. A marked decrease for subordinates at the During3 collection was not significant (Tukey *post hoc*: During1<sub>SUB</sub> v. During3<sub>SUB</sub>  $p = 0.73$ ; During2<sub>SUB</sub> v. During3<sub>SUB</sub>  $p = 0.66$ ). Error bars indicate mean  $\pm$  1 s.e.m.
